# Supplementary material for: The correlation ofmicroRNA-499rs3746444 T&gt;C locus with the susceptibility of gastric cancer: from a case–control study to a meta-analysis
Source: Oxford University Press journal article supplement (doi:10.1042/bsr20203461), 2020-12-15
Supplement: bsr-2020-3461_supp.pdf [file bsr-2020-3461_supp.pdf]

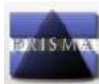

## PRISMA 2009 Checklist

| Section/topic             | #  | Checklist item                                                                                                                                                                                                                                                                                              | Reported on section #                               |
|---------------------------|----|-------------------------------------------------------------------------------------------------------------------------------------------------------------------------------------------------------------------------------------------------------------------------------------------------------------|-----------------------------------------------------|
| <b>TITLE</b>              |    |                                                                                                                                                                                                                                                                                                             |                                                     |
| Title                     | 1  | Identify the report as a systematic review, meta-analysis, or both.                                                                                                                                                                                                                                         | Title page                                          |
| <b>ABSTRACT</b>           |    |                                                                                                                                                                                                                                                                                                             |                                                     |
| Structured summary        | 2  | Provide a structured summary including, as applicable: background; objectives; data sources; study eligibility criteria, participants, and interventions; study appraisal and synthesis methods; results; limitations; conclusions and implications of key findings; systematic review registration number. | Abstract page                                       |
| <b>INTRODUCTION</b>       |    |                                                                                                                                                                                                                                                                                                             |                                                     |
| Rationale                 | 3  | Describe the rationale for the review in the context of what is already known.                                                                                                                                                                                                                              | Introduction, 3rd paragraph                         |
| Objectives                | 4  | Provide an explicit statement of questions being addressed with reference to participants, interventions, comparisons, outcomes, and study design (PICOS).                                                                                                                                                  | Introduction, 3rd paragraph                         |
| <b>METHODS</b>            |    |                                                                                                                                                                                                                                                                                                             |                                                     |
| Protocol and registration | 5  | Indicate if a review protocol exists, if and where it can be accessed (e.g., Web address), and, if available, provide registration information including registration number.                                                                                                                               | N/A                                                 |
| Eligibility criteria      | 6  | Specify study characteristics (e.g., PICOS, length of follow-up) and report characteristics (e.g., years considered, language, publication status) used as criteria for eligibility, giving rationale.                                                                                                      | Materials and Methods, meta-analysis, 3rd paragraph |
| Information sources       | 7  | Describe all information sources (e.g., databases with dates of coverage, contact with study authors to identify additional studies) in the search and date last searched.                                                                                                                                  | Materials and Methods, meta-analysis, 2nd paragraph |
| Search                    | 8  | Present full electronic search strategy for at least one database, including any limits used, such that it could be repeated.                                                                                                                                                                               | Materials and Methods, meta-analysis, 2nd paragraph |
| Study selection           | 9  | State the process for selecting studies (i.e., screening, eligibility, included in systematic review, and, if applicable, included in the meta-analysis).                                                                                                                                                   | Materials and Methods, meta-analysis, 3rd paragraph |
| Data collection process   | 10 | Describe method of data extraction from reports (e.g., piloted forms, independently, in duplicate) and any processes for obtaining and confirming data from investigators.                                                                                                                                  | Materials and Methods, meta-analysis, 3rd paragraph |

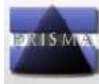

## PRISMA 2009 Checklist

|                                    |    |                                                                                                                                                                                                                        |                                                     |
|------------------------------------|----|------------------------------------------------------------------------------------------------------------------------------------------------------------------------------------------------------------------------|-----------------------------------------------------|
| Data items                         | 11 | List and define all variables for which data were sought (e.g., PICOS, funding sources) and any assumptions and simplifications made.                                                                                  | Materials and Methods, meta-analysis, 3rd paragraph |
| Risk of bias in individual studies | 12 | Describe methods used for assessing risk of bias of individual studies (including specification of whether this was done at the study or outcome level), and how this information is to be used in any data synthesis. | Materials and Methods, meta-analysis, 4th paragraph |
| Summary measures                   | 13 | State the principal summary measures (e.g., risk ratio, difference in means).                                                                                                                                          | Materials and Methods, meta-analysis, 4th paragraph |
| Synthesis of results               | 14 | Describe the methods of handling data and combining results of studies, if done, including measures of consistency (e.g., $I^2$ ) for each meta-analysis.                                                              | Materials and Methods, meta-analysis, 4th paragraph |

Page 1 of 2

| Section/topic                 | #  | Checklist item                                                                                                                                                                                           | Reported on page #                                                           |
|-------------------------------|----|----------------------------------------------------------------------------------------------------------------------------------------------------------------------------------------------------------|------------------------------------------------------------------------------|
| Risk of bias across studies   | 15 | Specify any assessment of risk of bias that may affect the cumulative evidence (e.g., publication bias, selective reporting within studies).                                                             | Materials and Methods, Statistical methods, 4th paragraph                    |
| Additional analyses           | 16 | Describe methods of additional analyses (e.g., sensitivity or subgroup analyses, meta-regression), if done, indicating which were pre-specified.                                                         | Materials and Methods, Statistical methods, 4th paragraph                    |
| <b>RESULTS</b>                |    |                                                                                                                                                                                                          |                                                                              |
| Study selection               | 17 | Give numbers of studies screened, assessed for eligibility, and included in the review, with reasons for exclusions at each stage, ideally with a flow diagram.                                          | Results, Meta-analysis results, 1st paragraph and Figure 1                   |
| Study characteristics         | 18 | For each study, present characteristics for which data were extracted (e.g., study size, PICOS, follow-up period) and provide the citations.                                                             | Results, Meta-analysis results, 1st paragraph, Table 4 and Table 5           |
| Risk of bias within studies   | 19 | Present data on risk of bias of each study and, if available, any outcome level assessment (see item 12).                                                                                                | Results, Meta-analysis results, 5-7th paragraph, and Figure 5-6 and Table 6. |
| Results of individual studies | 20 | For all outcomes considered (benefits or harms), present, for each study: (a) simple summary data for each intervention group (b) effect estimates and confidence intervals, ideally with a forest plot. | Results, Meta-analysis results, 2nd-4th paragraph Figure 2-4 and Table 7     |
| Synthesis of results          | 21 | Present results of each meta-analysis done, including confidence intervals and measures of consistency.                                                                                                  | Results, Meta-analysis results, 2nd-4th paragraph                            |



## PRISMA 2009 Checklist

|                             |    |                                                                                                                                                                                      |                                                                              |
|-----------------------------|----|--------------------------------------------------------------------------------------------------------------------------------------------------------------------------------------|------------------------------------------------------------------------------|
|                             |    |                                                                                                                                                                                      | Figure 2-4 and Table 7                                                       |
| Risk of bias across studies | 22 | Present results of any assessment of risk of bias across studies (see Item 15).                                                                                                      | Results, Meta-analysis results, 5-7th paragraph, and Figure 5-6 and Table 6. |
| Additional analysis         | 23 | Give results of additional analyses, if done (e.g., sensitivity or subgroup analyses, meta-regression [see Item 16]).                                                                | Results, Meta-analysis results, 5-7th paragraph, and Figure 5-6 and Table 6. |
| <b>DISCUSSION</b>           |    |                                                                                                                                                                                      |                                                                              |
| Summary of evidence         | 24 | Summarize the main findings including the strength of evidence for each main outcome; consider their relevance to key groups (e.g., healthcare providers, users, and policy makers). | Discussion, 1st paragraph                                                    |
| Limitations                 | 25 | Discuss limitations at study and outcome level (e.g., risk of bias), and at review-level (e.g., incomplete retrieval of identified research, reporting bias).                        | Discussion, 4th paragraph                                                    |
| Conclusions                 | 26 | Provide a general interpretation of the results in the context of other evidence, and implications for future research.                                                              | Discussion, 5th paragraph                                                    |
| <b>FUNDING</b>              |    |                                                                                                                                                                                      |                                                                              |
| Funding                     | 27 | Describe sources of funding for the systematic review and other support (e.g., supply of data); role of funders for the systematic review.                                           | Grant support                                                                |

| Subjects | Sex (male: 1;<br>female: 2) | Age<br>(year) | Smoking(Yes<br>: 1, No: 0) | Drinking<br>(Yes: 1,<br>No: 0) | BMI ( $\geq$<br>24: 1,<br><24: 0) | Rs3746444 genotypes |
|----------|-----------------------------|---------------|----------------------------|--------------------------------|-----------------------------------|---------------------|
| case-001 | 2                           | 72            | 0                          | 0                              | 0                                 | G/A                 |
| case-002 | 1                           | 63            | 0                          | 0                              | 0                                 | G/A                 |
| case-003 | 1                           | 63            | 0                          | 0                              | 1                                 | A/A                 |
| case-004 | 1                           | 52            | 1                          | 0                              | 0                                 | A/A                 |
| case-005 | 1                           | 66            | 1                          | 1                              | 0                                 | A/A                 |
| case-006 | 1                           | 49            | 0                          | 0                              | 0                                 | G/A                 |
| case-007 | 2                           | 54            | 0                          | 0                              | 1                                 | A/A                 |
| case-008 | 2                           | 44            | 0                          | 0                              | 0                                 | A/A                 |
| case-009 | 1                           | 71            | 1                          | 0                              | 0                                 | A/A                 |
| case-010 | 1                           | 50            | 1                          | 0                              | 0                                 | A/A                 |
| case-011 | 1                           | 69            | 0                          | 0                              | 1                                 | A/A                 |
| case-012 | 1                           | 53            | 0                          | 0                              | 0                                 | A/A                 |
| case-013 | 1                           | 83            | 0                          | 0                              | 0                                 | G/A                 |
| case-014 | 1                           | 83            | 0                          | 0                              | 1                                 | G/A                 |
| case-015 | 1                           | 48            | 0                          | 1                              | 0                                 | A/A                 |
| case-016 | 1                           | 65            | 1                          | 0                              | 0                                 | A/A                 |
| case-017 | 1                           | 69            | 0                          | 0                              | 1                                 | G/A                 |
| case-018 | 1                           | 77            | 0                          | 0                              | 0                                 | A/A                 |
| case-019 | 2                           | 53            | 0                          | 0                              | 0                                 | G/A                 |
| case-020 | 1                           | 48            | 1                          | 0                              | 0                                 | G/A                 |
| case-021 | 2                           | 52            | 0                          | 0                              | 1                                 | A/A                 |
| case-022 | 1                           | 46            | 0                          | 0                              | 0                                 | A/A                 |
| case-023 | 2                           | 69            | 0                          | 0                              | 0                                 | A/A                 |
| case-024 | 1                           | 67            | 1                          | 0                              | 0                                 | G/A                 |
| case-025 | 1                           | 68            | 1                          | 0                              | 1                                 | ?                   |
| case-026 | 1                           | 61            | 1                          | 0                              | 0                                 | G/A                 |
| case-027 | 1                           | 67            | 1                          | 1                              | 0                                 | A/A                 |
| case-028 | 2                           | 44            | 0                          | 0                              | 0                                 | A/A                 |
| case-029 | 1                           | 78            | 1                          | 0                              | 0                                 | G/A                 |
| case-030 | 2                           | 29            | 0                          | 0                              | 0                                 | G/A                 |
| case-031 | 1                           | 70            | 1                          | 1                              | 0                                 | A/A                 |
| case-032 | 1                           | 84            | 0                          | 0                              | 0                                 | A/A                 |
| case-033 | 2                           | 61            | 0                          | 0                              | 0                                 | A/A                 |
| case-034 | 1                           | 65            | 0                          | 0                              | 1                                 | G/A                 |
| case-035 | 2                           | 66            | 0                          | 0                              | 0                                 | A/A                 |
| case-036 | 1                           | 75            | 1                          | 1                              | 0                                 | A/A                 |
| case-037 | 1                           | 64            | 0                          | 0                              | 0                                 | G/A                 |
| case-038 | 2                           | 64            | 0                          | 0                              | 0                                 | G/A                 |
| case-039 | 1                           | 76            | 0                          | 0                              | 0                                 | G/A                 |
| case-040 | 1                           | 55            | 1                          | 1                              | 1                                 | A/A                 |
| case-041 | 1                           | 57            | 1                          | 1                              | 1                                 | A/A                 |
| case-042 | 1                           | 50            | 0                          | 0                              | 1                                 | A/A                 |
| case-043 | 1                           | 70            | 0                          | 0                              | 0                                 | A/A                 |
| case-044 | 2                           | 54            | 0                          | 0                              | 0                                 | A/A                 |
| case-045 | 1                           | 49            | 0                          | 0                              | 1                                 | A/A                 |
| case-046 | 2                           | 53            | 0                          | 0                              | 0                                 | A/A                 |
| case-047 | 1                           | 72            | 0                          | 0                              | 1                                 | A/A                 |
| case-048 | 2                           | 64            | 0                          | 0                              | 0                                 | A/A                 |
| case-049 | 1                           | 57            | 1                          | 1                              | 0                                 | G/A                 |
| case-050 | 2                           | 52            | 0                          | 0                              | 1                                 | A/A                 |
| case-051 | 2                           | 69            | 0                          | 0                              | 1                                 | A/A                 |
| case-052 | 2                           | 71            | 0                          | 0                              | 0                                 | A/A                 |
| case-053 | 1                           | 78            | 0                          | 0                              | 1                                 | A/A                 |
| case-054 | 2                           | 51            | 0                          | 0                              | 0                                 | A/A                 |
| case-055 | 2                           | 33            | 0                          | 0                              | 0                                 | A/A                 |

|          |   |    |   |   |   |     |
|----------|---|----|---|---|---|-----|
| case-056 | 1 | 64 | 1 | 0 | 0 | A/A |
| case-057 | 1 | 51 | 0 | 0 | 0 | A/A |
| case-058 | 1 | 78 | 1 | 0 | 1 | A/A |
| case-059 | 1 | 79 | 1 | 0 | 0 | G/A |
| case-060 | 2 | 77 | 0 | 0 | 1 | A/A |
| case-061 | 1 | 38 | 1 | 0 | 1 | A/A |
| case-062 | 2 | 54 | 0 | 0 | 0 | A/A |
| case-063 | 2 | 44 | 0 | 0 | 0 | A/A |
| case-064 | 1 | 72 | 0 | 0 | 1 | A/A |
| case-065 | 1 | 82 | 0 | 1 | 0 | A/A |
| case-066 | 2 | 69 | 0 | 0 | 0 | G/A |
| case-067 | 2 | 44 | 0 | 0 | 0 | G/A |
| case-068 | 1 | 59 | 1 | 1 | 0 | G/A |
| case-069 | 2 | 78 | 0 | 0 | 0 | A/A |
| case-070 | 1 | 57 | 1 | 1 | 1 | A/A |
| case-071 | 2 | 45 | 0 | 0 | 0 | A/A |
| case-072 | 1 | 50 | 1 | 1 | 0 | A/A |
| case-073 | 1 | 57 | 0 | 0 | 0 | A/A |
| case-074 | 1 | 65 | 1 | 1 | 0 | A/A |
| case-075 | 2 | 51 | 0 | 0 | 1 | G/G |
| case-076 | 1 | 67 | 1 | 1 | 1 | A/A |
| case-077 | 2 | 67 | 0 | 0 | 0 | A/A |
| case-078 | 1 | 50 | 1 | 1 | 0 | A/A |
| case-079 | 1 | 64 | 1 | 0 | 0 | A/A |
| case-080 | 1 | 54 | 1 | 0 | 0 | A/A |
| case-081 | 1 | 42 | 0 | 1 | 0 | A/A |
| case-082 | 1 | 75 | 1 | 1 | 0 | G/A |
| case-083 | 1 | 72 | 1 | 1 | 0 | A/A |
| case-084 | 2 | 56 | 0 | 0 | 0 | G/A |
| case-085 | 1 | 50 | 1 | 1 | 0 | G/A |
| case-086 | 1 | 66 | 1 | 1 | 0 | G/A |
| case-087 | 1 | 42 | 0 | 1 | 0 | A/A |
| case-088 | 1 | 41 | 0 | 1 | 0 | A/A |
| case-089 | 1 | 50 | 1 | 1 | 0 | A/A |
| case-090 | 1 | 60 | 0 | 0 | 0 | A/A |
| case-091 | 1 | 66 | 1 | 1 | 0 | A/A |
| case-092 | 2 | 31 | 0 | 0 | 1 | A/A |
| case-093 | 1 | 73 | 0 | 0 | 0 | A/A |
| case-094 | 1 | 42 | 1 | 0 | 0 | A/A |
| case-095 | 1 | 50 | 1 | 0 | 0 | A/A |
| case-096 | 2 | 29 | 0 | 0 | 0 | A/A |
| case-097 | 2 | 41 | 0 | 0 | 0 | G/A |
| case-098 | 2 | 49 | 0 | 0 | 1 | G/A |
| case-099 | 2 | 42 | 0 | 0 | 0 | G/A |
| case-100 | 1 | 54 | 1 | 1 | 0 | G/A |
| case-101 | 2 | 53 | 0 | 0 | 1 | G/A |
| case-102 | 1 | 62 | 1 | 1 | 0 | G/A |
| case-103 | 2 | 44 | 0 | 0 | 0 | A/A |
| case-104 | 2 | 61 | 1 | 0 | 1 | A/A |
| case-105 | 1 | 74 | 1 | 0 | 0 | A/A |
| case-106 | 1 | 59 | 0 | 0 | 0 | G/A |
| case-107 | 2 | 34 | 0 | 0 | 0 | A/A |
| case-108 | 1 | 62 | 0 | 0 | 0 | A/A |
| case-109 | 1 | 60 | 1 | 0 | 1 | A/A |
| case-110 | 1 | 80 | 1 | 1 | 0 | A/A |
| case-111 | 2 | 74 | 0 | 0 | 1 | A/A |
| case-112 | 1 | 53 | 1 | 0 | 0 | A/A |
| case-113 | 1 | 67 | 0 | 1 | 0 | G/A |

|          |   |    |   |   |   |     |
|----------|---|----|---|---|---|-----|
| case-114 | 2 | 42 | 0 | 0 | 0 | A/A |
| case-115 | 1 | 67 | 1 | 1 | 0 | A/A |
| case-116 | 2 | 58 | 0 | 0 | 0 | A/A |
| case-117 | 2 | 48 | 0 | 0 | 0 | G/A |
| case-118 | 1 | 61 | 1 | 0 | 0 | A/A |
| case-119 | 1 | 64 | 0 | 0 | 1 | G/A |
| case-120 | 1 | 75 | 1 | 1 | 0 | A/A |
| case-121 | 1 | 63 | 0 | 0 | 1 | G/A |
| case-122 | 1 | 61 | 0 | 1 | 1 | A/A |
| case-123 | 2 | 56 | 0 | 0 | 0 | A/A |
| case-124 | 1 | 62 | 1 | 1 | 1 | A/A |
| case-125 | 2 | 68 | 0 | 0 | 0 | A/A |
| case-126 | 1 | 74 | 0 | 0 | 1 | G/A |
| case-127 | 2 | 70 | 0 | 0 | 0 | A/A |
| case-128 | 1 | 58 | 1 | 1 | 0 | G/A |
| case-129 | 2 | 54 | 0 | 0 | 1 | A/A |
| case-130 | 1 | 62 | 0 | 0 | 0 | G/G |
| case-131 | 1 | 74 | 1 | 0 | 0 | G/A |
| case-132 | 2 | 35 | 0 | 0 | 0 | A/A |
| case-133 | 1 | 63 | 1 | 1 | 1 | A/A |
| case-134 | 2 | 61 | 0 | 0 | 0 | A/A |
| case-135 | 1 | 53 | 1 | 1 | 0 | A/A |
| case-136 | 1 | 70 | 0 | 1 | 0 | A/A |
| case-137 | 1 | 48 | 0 | 1 | 1 | G/A |
| case-138 | 2 | 69 | 0 | 0 | 0 | G/A |
| case-139 | 1 | 65 | 1 | 0 | 0 | A/A |
| case-140 | 2 | 61 | 0 | 0 | 0 | G/G |
| case-141 | 1 | 61 | 0 | 0 | 0 | A/A |
| case-142 | 2 | 73 | 0 | 0 | 1 | G/A |
| case-143 | 1 | 52 | 1 | 0 | 0 | A/A |
| case-144 | 1 | 64 | 0 | 1 | 0 | A/A |
| case-145 | 1 | 60 | 1 | 0 | 0 | A/A |
| case-146 | 1 | 55 | 1 | 1 | 1 | G/A |
| case-147 | 1 | 70 | 1 | 0 | 0 | A/A |
| case-148 | 1 | 84 | 1 | 1 | 1 | A/A |
| case-149 | 1 | 64 | 1 | 0 | 1 | A/A |
| case-150 | 2 | 71 | 0 | 0 | 0 | A/A |
| case-151 | 1 | 67 | 1 | 0 | 1 | G/A |
| case-152 | 1 | 51 | 1 | 0 | 0 | A/A |
| case-153 | 1 | 53 | 1 | 0 | 0 | A/A |
| case-154 | 1 | 64 | 1 | 1 | 0 | A/A |
| case-155 | 1 | 54 | 0 | 0 | 0 | A/A |
| case-156 | 1 | 56 | 1 | 1 | 0 | A/A |
| case-157 | 2 | 63 | 0 | 0 | 1 | A/A |
| case-158 | 1 | 51 | 1 | 1 | 0 | A/A |
| case-159 | 1 | 53 | 0 | 1 | 1 | A/A |
| case-160 | 2 | 51 | 0 | 0 | 0 | A/A |
| case-161 | 1 | 63 | 1 | 1 | 0 | A/A |
| case-162 | 1 | 53 | 1 | 1 | 0 | G/G |
| case-163 | 1 | 56 | 0 | 0 | 0 | A/A |
| case-164 | 1 | 69 | 1 | 1 | 0 | G/A |
| case-165 | 1 | 76 | 1 | 1 | 0 | A/A |
| case-166 | 1 | 62 | 1 | 0 | 0 | A/A |
| case-167 | 2 | 61 | 0 | 0 | 0 | A/A |
| case-168 | 1 | 67 | 0 | 1 | 0 | A/A |
| case-169 | 2 | 64 | 0 | 0 | 0 | A/A |
| case-170 | 1 | 73 | 0 | 1 | 0 | A/A |
| case-171 | 2 | 82 | 0 | 0 | 0 | A/A |

|          |   |    |   |   |   |     |
|----------|---|----|---|---|---|-----|
| case-172 | 2 | 47 | 0 | 0 | 0 | G/A |
| case-173 | 2 | 48 | 0 | 0 | 0 | A/A |
| case-174 | 1 | 49 | 1 | 1 | 0 | G/A |
| case-175 | 2 | 40 | 0 | 0 | 0 | A/A |
| case-176 | 2 | 77 | 0 | 0 | 0 | G/A |
| case-177 | 1 | 54 | 1 | 0 | 1 | G/A |
| case-178 | 1 | 71 | 0 | 0 | 0 | G/A |
| case-179 | 1 | 76 | 1 | 1 | 0 | A/A |
| case-180 | 1 | 59 | 1 | 0 | 0 | G/G |
| case-181 | 1 | 72 | 0 | 0 | 0 | A/A |
| case-182 | 2 | 73 | 0 | 0 | 1 | A/A |
| case-183 | 2 | 30 | 0 | 0 | 0 | A/A |
| case-184 | 1 | 64 | 1 | 1 | 0 | A/A |
| case-185 | 2 | 81 | 0 | 0 | 0 | G/A |
| case-186 | 1 | 63 | 1 | 0 | 1 | A/A |
| case-187 | 1 | 69 | 1 | 1 | 1 | G/A |
| case-188 | 1 | 78 | 1 | 1 | 0 | G/A |
| case-189 | 2 | 78 | 0 | 0 | 0 | A/A |
| case-190 | 1 | 67 | 1 | 0 | 0 | G/A |
| case-191 | 1 | 53 | 1 | 1 | 0 | A/A |
| case-192 | 1 | 58 | 1 | 0 | 0 | A/A |
| case-193 | 1 | 69 | 0 | 0 | 0 | A/A |
| case-194 | 1 | 72 | 1 | 0 | 0 | G/A |
| case-195 | 1 | 70 | 1 | 1 | 0 | A/A |
| case-196 | 2 | 56 | 0 | 0 | 0 | G/A |
| case-197 | 1 | 69 | 1 | 1 | 0 | G/A |
| case-198 | 1 | 79 | 0 | 0 | 0 | G/A |
| case-199 | 2 | 57 | 0 | 0 | 0 | A/A |
| case-200 | 1 | 56 | 0 | 0 | 0 | A/A |
| case-201 | 1 | 53 | 1 | 1 | 1 | G/A |
| case-202 | 1 | 57 | 1 | 0 | 0 | A/A |
| case-203 | 1 | 62 | 0 | 0 | 1 | A/A |
| case-204 | 1 | 67 | 0 | 0 | 0 | A/A |
| case-205 | 2 | 71 | 0 | 0 | 0 | A/A |
| case-206 | 1 | 66 | 1 | 1 | 0 | G/A |
| case-207 | 1 | 46 | 1 | 1 | 0 | A/A |
| case-208 | 2 | 51 | 0 | 0 | 0 | A/A |
| case-209 | 1 | 75 | 0 | 0 | 0 | G/A |
| case-210 | 2 | 49 | 0 | 0 | 1 | A/A |
| case-211 | 2 | 61 | 0 | 0 | 0 | A/A |
| case-212 | 1 | 66 | 1 | 1 | 0 | A/A |
| case-213 | 2 | 82 | 0 | 0 | 0 | G/A |
| case-214 | 1 | 69 | 1 | 0 | 1 | A/A |
| case-215 | 1 | 58 | 1 | 0 | 1 | G/A |
| case-216 | 1 | 69 | 1 | 0 | 0 | G/A |
| case-217 | 1 | 71 | 0 | 0 | 1 | G/G |
| case-218 | 1 | 72 | 0 | 0 | 0 | G/A |
| case-219 | 2 | 78 | 0 | 0 | 1 | A/A |
| case-220 | 2 | 56 | 0 | 0 | 0 | G/A |
| case-221 | 1 | 59 | 1 | 1 | 1 | G/A |
| case-222 | 1 | 60 | 0 | 0 | 0 | A/A |
| case-223 | 1 | 50 | 0 | 0 | 0 | A/A |
| case-224 | 1 | 60 | 1 | 1 | 0 | A/A |
| case-225 | 2 | 55 | 0 | 0 | 0 | A/A |
| case-226 | 1 | 47 | 1 | 0 | 1 | G/A |
| case-227 | 2 | 47 | 0 | 0 | 0 | A/A |
| case-228 | 1 | 48 | 1 | 0 | 0 | A/A |
| case-229 | 2 | 33 | 0 | 0 | 0 | G/A |

|          |   |    |   |   |   |     |
|----------|---|----|---|---|---|-----|
| case-230 | 1 | 42 | 1 | 1 | 0 | A/A |
| case-231 | 1 | 79 | 0 | 0 | 0 | A/A |
| case-232 | 1 | 58 | 1 | 1 | 0 | G/A |
| case-233 | 2 | 63 | 0 | 0 | 0 | A/A |
| case-234 | 1 | 50 | 0 | 0 | 0 | A/A |
| case-235 | 2 | 33 | 0 | 0 | 0 | A/A |
| case-236 | 1 | 60 | 0 | 0 | 1 | A/A |
| case-237 | 1 | 70 | 0 | 0 | 0 | G/A |
| case-238 | 1 | 56 | 1 | 1 | 0 | A/A |
| case-239 | 1 | 61 | 1 | 1 | 0 | A/A |
| case-240 | 1 | 70 | 1 | 1 | 0 | G/A |
| case-241 | 1 | 40 | 1 | 0 | 0 | G/A |
| case-242 | 2 | 64 | 0 | 0 | 0 | G/A |
| case-243 | 2 | 71 | 0 | 0 | 1 | A/A |
| case-244 | 1 | 62 | 0 | 0 | 1 | A/A |
| case-245 | 2 | 35 | 0 | 0 | 0 | A/A |
| case-246 | 2 | 79 | 0 | 0 | 0 | G/A |
| case-247 | 1 | 70 | 1 | 0 | 0 | A/A |
| case-248 | 1 | 51 | 1 | 1 | 0 | A/A |
| case-249 | 1 | 60 | 0 | 0 | 0 | A/A |
| case-250 | 1 | 72 | 0 | 0 | 0 | G/A |
| case-251 | 1 | 58 | 0 | 0 | 1 | G/A |
| case-252 | 1 | 61 | 0 | 1 | 0 | A/A |
| case-253 | 2 | 65 | 0 | 0 | 1 | A/A |
| case-254 | 1 | 69 | 1 | 0 | 0 | G/A |
| case-255 | 2 | 74 | 0 | 0 | 0 | A/A |
| case-256 | 2 | 51 | 0 | 0 | 0 | A/A |
| case-257 | 1 | 76 | 0 | 0 | 1 | A/A |
| case-258 | 1 | 58 | 1 | 0 | 0 | G/A |
| case-259 | 1 | 68 | 0 | 0 | 0 | ?   |
| case-260 | 1 | 58 | 1 | 0 | 1 | A/A |
| case-261 | 1 | 56 | 0 | 0 | 0 | A/A |
| case-262 | 1 | 52 | 1 | 1 | 0 | A/A |
| case-263 | 2 | 46 | 0 | 0 | 0 | G/G |
| case-264 | 1 | 69 | 0 | 0 | 0 | G/A |
| case-265 | 1 | 55 | 1 | 1 | 0 | A/A |
| case-266 | 1 | 51 | 1 | 0 | 0 | A/A |
| case-267 | 1 | 42 | 0 | 0 | 1 | G/A |
| case-268 | 2 | 51 | 0 | 0 | 0 | A/A |
| case-269 | 1 | 69 | 0 | 0 | 1 | A/A |
| case-270 | 1 | 57 | 1 | 1 | 0 | A/A |
| case-271 | 1 | 61 | 0 | 0 | 0 | A/A |
| case-272 | 2 | 46 | 0 | 0 | 0 | A/A |
| case-273 | 1 | 58 | 1 | 1 | 0 | A/A |
| case-274 | 1 | 56 | 1 | 0 | 0 | A/A |
| case-275 | 1 | 53 | 1 | 0 | 0 | A/A |
| case-276 | 1 | 64 | 0 | 0 | 1 | A/A |
| case-277 | 1 | 83 | 0 | 0 | 0 | A/A |
| case-278 | 1 | 68 | 1 | 0 | 0 | A/A |
| case-279 | 1 | 54 | 1 | 1 | 0 | G/A |
| case-280 | 2 | 45 | 0 | 0 | 1 | G/A |
| case-281 | 1 | 62 | 1 | 0 | 0 | A/A |
| case-282 | 1 | 64 | 1 | 0 | 0 | G/A |
| case-283 | 1 | 63 | 0 | 0 | 1 | G/G |
| case-284 | 2 | 46 | 0 | 0 | 0 | A/A |
| case-285 | 1 | 37 | 0 | 0 | 0 | G/A |
| case-286 | 2 | 38 | 0 | 0 | 0 | A/A |
| case-287 | 1 | 60 | 1 | 1 | 1 | A/A |



|          |   |    |   |   |   |     |
|----------|---|----|---|---|---|-----|
| case-288 | 1 | 64 | 0 | 0 | 0 | G/A |
| case-289 | 1 | 54 | 1 | 0 | 0 | A/A |
| case-290 | 2 | 40 | 0 | 0 | 0 | A/A |
| case-291 | 2 | 52 | 0 | 0 | 0 | G/A |
| case-292 | 2 | 57 | 0 | 0 | 0 | A/A |
| case-293 | 1 | 56 | 1 | 1 | 0 | G/A |
| case-294 | 2 | 62 | 0 | 0 | 0 | A/A |
| case-295 | 1 | 61 | 0 | 0 | 0 | A/A |
| case-296 | 1 | 52 | 1 | 0 | 1 | A/A |
| case-297 | 1 | 41 | 1 | 0 | 0 | G/G |
| case-298 | 1 | 68 | 0 | 0 | 0 | A/A |
| case-299 | 2 | 65 | 0 | 0 | 1 | A/A |
| case-300 | 1 | 50 | 0 | 0 | 1 | A/A |
| case-301 | 1 | 64 | 1 | 0 | 1 | A/A |
| case-302 | 1 | 56 | 1 | 1 | 0 | A/A |
| case-303 | 2 | 52 | 0 | 0 | 0 | A/A |
| case-304 | 1 | 68 | 1 | 0 | 0 | A/A |
| case-305 | 1 | 63 | 0 | 0 | 0 | A/A |
| case-306 | 2 | 48 | 0 | 0 | 0 | G/A |
| case-307 | 2 | 29 | 0 | 0 | 0 | A/A |
| case-308 | 2 | 66 | 0 | 0 | 0 | A/A |
| case-309 | 1 | 53 | 1 | 1 | 1 | A/A |
| case-310 | 1 | 64 | 0 | 0 | 1 | A/A |
| case-311 | 1 | 72 | 1 | 1 | 0 | A/A |
| case-312 | 2 | 63 | 0 | 0 | 1 | A/A |
| case-313 | 2 | 54 | 0 | 0 | 1 | A/A |
| case-314 | 1 | 45 | 0 | 0 | 0 | A/A |
| case-315 | 1 | 58 | 0 | 0 | 0 | G/A |
| case-316 | 2 | 27 | 0 | 0 | 0 | A/A |
| case-317 | 1 | 66 | 0 | 0 | 0 | A/A |
| case-318 | 1 | 49 | 0 | 0 | 0 | A/A |
| case-319 | 1 | 47 | 1 | 1 | 0 | A/A |
| case-320 | 2 | 51 | 0 | 0 | 0 | A/A |
| case-321 | 2 | 67 | 0 | 0 | 0 | A/A |
| case-322 | 2 | 44 | 0 | 0 | 0 | A/A |
| case-323 | 1 | 70 | 1 | 1 | 0 | A/A |
| case-324 | 1 | 72 | 1 | 0 | 0 | G/G |
| case-325 | 1 | 58 | 1 | 0 | 0 | G/A |
| case-326 | 1 | 49 | 1 | 0 | 0 | A/A |
| case-327 | 1 | 70 | 0 | 0 | 1 | A/A |
| case-328 | 1 | 64 | 0 | 1 | 0 | A/A |
| case-329 | 2 | 52 | 0 | 0 | 1 | G/A |
| case-330 | 1 | 68 | 0 | 1 | 1 | A/A |
| case-331 | 1 | 60 | 1 | 1 | 0 | G/G |
| case-332 | 1 | 52 | 1 | 0 | 1 | A/A |
| case-333 | 2 | 69 | 0 | 0 | 1 | A/A |
| case-334 | 2 | 67 | 0 | 0 | 0 | A/A |
| case-335 | 1 | 72 | 1 | 0 | 1 | A/A |
| case-336 | 1 | 69 | 1 | 0 | 0 | A/A |
| case-337 | 1 | 62 | 0 | 0 | 1 | A/A |
| case-338 | 1 | 66 | 0 | 1 | 1 | A/A |
| case-339 | 2 | 49 | 1 | 0 | 0 | G/A |
| case-340 | 1 | 71 | 0 | 0 | 0 | A/A |
| case-341 | 1 | 38 | 1 | 1 | 1 | A/A |
| case-342 | 2 | 54 | 0 | 0 | 0 | A/A |
| case-343 | 2 | 74 | 0 | 0 | 0 | G/A |
| case-344 | 1 | 71 | 0 | 0 | 1 | A/A |
| case-345 | 1 | 57 | 0 | 0 | 0 | A/A |

|          |   |    |   |   |   |     |
|----------|---|----|---|---|---|-----|
| case-346 | 1 | 59 | 0 | 0 | 0 | G/A |
| case-347 | 1 | 69 | 1 | 1 | 0 | A/A |
| case-348 | 2 | 52 | 0 | 0 | 0 | A/A |
| case-349 | 2 | 49 | 0 | 0 | 0 | G/A |
| case-350 | 1 | 34 | 1 | 0 | 0 | A/A |
| case-351 | 1 | 61 | 1 | 1 | 1 | A/A |
| case-352 | 2 | 66 | 0 | 0 | 0 | G/A |
| case-353 | 1 | 59 | 0 | 0 | 0 | G/A |
| case-354 | 1 | 73 | 1 | 1 | 1 | A/A |
| case-355 | 1 | 48 | 0 | 0 | 1 | A/A |
| case-356 | 1 | 67 | 1 | 1 | 1 | A/A |
| case-357 | 1 | 59 | 0 | 1 | 0 | A/A |
| case-358 | 2 | 76 | 0 | 0 | 1 | A/A |
| case-359 | 1 | 72 | 0 | 0 | 1 | A/A |
| case-360 | 1 | 64 | 1 | 1 | 0 | A/A |
| case-361 | 1 | 69 | 1 | 1 | 0 | A/A |
| case-362 | 2 | 65 | 0 | 0 | 0 | A/A |
| case-363 | 1 | 64 | 0 | 0 | 0 | G/G |
| case-364 | 1 | 70 | 1 | 0 | 0 | A/A |
| case-365 | 1 | 77 | 1 | 0 | 0 | A/A |
| case-366 | 1 | 63 | 1 | 1 | 0 | G/A |
| case-367 | 1 | 60 | 1 | 0 | 0 | A/A |
| case-368 | 2 | 43 | 0 | 0 | 0 | G/A |
| case-369 | 1 | 68 | 0 | 0 | 0 | A/A |
| case-370 | 2 | 71 | 0 | 0 | 0 | G/A |
| case-371 | 1 | 45 | 1 | 1 | 0 | G/A |
| case-372 | 1 | 56 | 1 | 1 | 0 | A/A |
| case-373 | 2 | 42 | 0 | 0 | 0 | G/A |
| case-374 | 1 | 59 | 0 | 0 | 0 | G/A |
| case-375 | 1 | 61 | 1 | 0 | 1 | A/A |
| case-376 | 1 | 45 | 1 | 1 | 1 | G/A |
| case-377 | 1 | 63 | 0 | 0 | 0 | G/A |
| case-378 | 1 | 62 | 1 | 0 | 0 | A/A |
| case-379 | 2 | 66 | 0 | 0 | 1 | A/A |
| case-380 | 1 | 61 | 1 | 0 | 0 | A/A |
| case-381 | 1 | 65 | 1 | 1 | 0 | G/G |
| case-382 | 1 | 59 | 1 | 1 | 0 | A/A |
| case-383 | 1 | 49 | 0 | 1 | 1 | G/A |
| case-384 | 1 | 61 | 1 | 1 | 0 | A/A |
| case-385 | 2 | 58 | 0 | 0 | 0 | G/A |
| case-386 | 1 | 64 | 0 | 1 | 1 | G/A |
| case-387 | 1 | 72 | 0 | 0 | 0 | A/A |
| case-388 | 1 | 75 | 0 | 0 | 0 | A/A |
| case-389 | 1 | 42 | 1 | 1 | 0 | A/A |
| case-390 | 1 | 61 | 1 | 0 | 0 | A/A |
| case-391 | 1 | 50 | 1 | 0 | 0 | G/A |
| case-392 | 1 | 63 | 0 | 0 | 0 | A/A |
| case-393 | 1 | 83 | 0 | 0 | 0 | G/A |
| case-394 | 1 | 72 | 0 | 0 | 0 | A/A |
| case-395 | 2 | 62 | 0 | 0 | 1 | G/A |
| case-396 | 2 | 70 | 0 | 0 | 0 | A/A |
| case-397 | 1 | 53 | 0 | 0 | 0 | A/A |
| case-398 | 2 | 49 | 0 | 0 | 1 | A/A |
| case-399 | 2 | 65 | 0 | 0 | 1 | A/A |
| case-400 | 1 | 71 | 1 | 0 | 1 | A/A |
| case-401 | 1 | 59 | 1 | 0 | 0 | G/G |
| case-402 | 1 | 52 | 0 | 0 | 0 | A/A |
| case-403 | 1 | 79 | 0 | 0 | 0 | G/G |

|          |   |    |   |   |   |     |
|----------|---|----|---|---|---|-----|
| case-404 | 2 | 55 | 0 | 0 | 1 | A/A |
| case-405 | 2 | 53 | 0 | 0 | 0 | A/A |
| case-406 | 1 | 70 | 1 | 0 | 1 | G/A |
| case-407 | 1 | 71 | 0 | 0 | 0 | A/A |
| case-408 | 1 | 52 | 1 | 0 | 0 | G/A |
| case-409 | 1 | 66 | 0 | 1 | 0 | A/A |
| case-410 | 2 | 55 | 0 | 0 | 0 | A/A |
| case-411 | 2 | 66 | 0 | 0 | 1 | A/A |
| case-412 | 2 | 63 | 0 | 0 | 1 | A/A |
| case-413 | 2 | 49 | 0 | 0 | 0 | A/A |
| case-414 | 1 | 71 | 0 | 0 | 0 | A/A |
| case-415 | 1 | 63 | 0 | 0 | 0 | A/A |
| case-416 | 1 | 64 | 0 | 0 | 0 | G/A |
| case-417 | 1 | 63 | 0 | 1 | 1 | A/A |
| case-418 | 1 | 51 | 1 | 0 | 0 | A/A |
| case-419 | 2 | 47 | 0 | 0 | 0 | A/A |
| case-420 | 1 | 49 | 0 | 0 | 0 | A/A |
| case-421 | 1 | 43 | 0 | 0 | 1 | A/A |
| case-422 | 2 | 73 | 0 | 0 | 0 | A/A |
| case-423 | 1 | 61 | 0 | 0 | 0 | A/A |
| case-424 | 1 | 54 | 1 | 1 | 0 | A/A |
| case-425 | 1 | 64 | 1 | 1 | 0 | A/A |
| case-426 | 1 | 58 | 1 | 1 | 1 | ?   |
| case-427 | 1 | 77 | 0 | 1 | 0 | A/A |
| case-428 | 2 | 69 | 0 | 0 | 0 | A/A |
| case-429 | 1 | 67 | 0 | 0 | 0 | A/A |
| case-430 | 1 | 79 | 0 | 0 | 1 | A/A |
| case-431 | 1 | 60 | 0 | 0 | 0 | G/A |
| case-432 | 1 | 65 | 1 | 0 | 0 | A/A |
| case-433 | 1 | 54 | 0 | 0 | 0 | A/A |
| case-434 | 1 | 57 | 0 | 0 | 1 | A/A |
| case-435 | 2 | 57 | 0 | 0 | 0 | G/A |
| case-436 | 1 | 44 | 0 | 0 | 1 | A/A |
| case-437 | 1 | 70 | 0 | 0 | 1 | A/A |
| case-438 | 1 | 58 | 0 | 1 | 0 | A/A |
| case-439 | 2 | 43 | 0 | 0 | 0 | A/A |
| case-440 | 1 | 74 | 0 | 0 | 0 | G/G |
| case-441 | 1 | 73 | 1 | 0 | 1 | A/A |
| case-442 | 2 | 75 | 0 | 0 | 1 | G/A |
| case-443 | 2 | 44 | 0 | 0 | 0 | A/A |
| case-444 | 1 | 75 | 0 | 0 | 1 | G/A |
| case-445 | 1 | 85 | 0 | 0 | 0 | A/A |
| case-446 | 2 | 46 | 0 | 0 | 0 | A/A |
| case-447 | 1 | 59 | 1 | 0 | 0 | A/A |
| case-448 | 2 | 53 | 0 | 0 | 1 | A/A |
| case-449 | 1 | 72 | 1 | 1 | 0 | A/A |
| case-450 | 2 | 70 | 0 | 0 | 0 | G/A |
| case-451 | 1 | 69 | 0 | 0 | 0 | A/A |
| case-452 | 1 | 78 | 1 | 1 | 1 | G/A |
| case-453 | 1 | 64 | 0 | 0 | 0 | G/A |
| case-454 | 1 | 71 | 0 | 0 | 1 | G/A |
| case-455 | 2 | 78 | 0 | 0 | 0 | A/A |
| case-456 | 2 | 75 | 0 | 0 | 1 | G/A |
| case-457 | 1 | 77 | 0 | 0 | 0 | A/A |
| case-458 | 1 | 51 | 0 | 0 | 1 | A/A |
| case-459 | 1 | 74 | 0 | 1 | 0 | A/A |
| case-460 | 2 | 40 | 0 | 0 | 0 | A/A |
| case-461 | 2 | 66 | 0 | 0 | 0 | A/A |

|             |   |    |   |   |   |     |
|-------------|---|----|---|---|---|-----|
| case-462    | 1 | 66 | 0 | 0 | 0 | A/A |
| case-463    | 1 | 69 | 0 | 0 | 0 | G/A |
| case-464    | 1 | 75 | 0 | 0 | 1 | A/A |
| case-465    | 2 | 65 | 0 | 0 | 1 | A/A |
| case-466    | 2 | 65 | 0 | 0 | 1 | A/A |
| case-467    | 1 | 64 | 0 | 0 | 1 | A/A |
| case-468    | 1 | 80 | 1 | 0 | 0 | G/A |
| case-469    | 1 | 74 | 0 | 0 | 1 | G/G |
| case-470    | 2 | 50 | 0 | 0 | 1 | A/A |
| case-471    | 2 | 66 | 0 | 0 | 0 | A/A |
| case-472    | 2 | 47 | 0 | 0 | 1 | G/A |
| case-473    | 1 | 69 | 1 | 0 | 0 | A/A |
| case-474    | 1 | 60 | 1 | 0 | 0 | A/A |
| case-475    | 1 | 55 | 0 | 0 | 0 | A/A |
| case-476    | 2 | 67 | 0 | 0 | 0 | A/A |
| case-477    | 1 | 49 | 0 | 0 | 1 | G/A |
| case-478    | 1 | 65 | 1 | 0 | 1 | A/A |
| case-479    | 1 | 62 | 0 | 0 | 0 | G/A |
| case-480    | 2 | 78 | 0 | 0 | 0 | A/A |
| case-481    | 1 | 63 | 0 | 0 | 1 | A/A |
| case-482    | 1 | 61 | 1 | 0 | 1 | A/A |
| case-483    | 2 | 88 | 0 | 1 | 0 | A/A |
| case-484    | 1 | 83 | 0 | 0 | 0 | A/A |
| case-485    | 2 | 72 | 0 | 0 | 0 | A/A |
| case-486    | 2 | 73 | 0 | 0 | 0 | A/A |
| case-487    | 2 | 61 | 0 | 0 | 0 | A/A |
| case-488    | 1 | 69 | 1 | 0 | 1 | A/A |
| case-489    | 1 | 73 | 1 | 0 | 0 | A/A |
| case-490    | 2 | 55 | 0 | 0 | 0 | G/A |
| control-001 | 1 | 55 | 0 | 0 | 1 | A/A |
| control-002 | 2 | 53 | 0 | 0 | 1 | A/A |
| control-003 | 1 | 59 | 0 | 0 | 1 | A/A |
| control-004 | 1 | 74 | 0 | 0 | 1 | A/A |
| control-005 | 2 | 54 | 0 | 0 | 0 | G/A |
| control-006 | 2 | 70 | 0 | 0 | 1 | G/A |
| control-007 | 1 | 65 | 1 | 0 | 0 | G/A |
| control-008 | 1 | 62 | 0 | 0 | 0 | A/A |
| control-009 | 2 | 77 | 0 | 0 | 1 | A/A |
| control-010 | 2 | 56 | 0 | 0 | 0 | A/A |
| control-011 | 1 | 63 | 0 | 0 | 0 | A/A |
| control-012 | 1 | 51 | 0 | 0 | 1 | G/A |
| control-013 | 2 | 61 | 0 | 0 | 0 | A/A |
| control-014 | 1 | 57 | 1 | 0 | 1 | A/A |
| control-015 | 1 | 81 | 0 | 0 | 1 | A/A |
| control-016 | 1 | 79 | 0 | 0 | 1 | A/A |
| control-017 | 1 | 53 | 1 | 0 | 0 | G/A |
| control-018 | 1 | 65 | 0 | 0 | 0 | A/A |
| control-019 | 1 | 56 | 0 | 1 | 1 | A/A |
| control-020 | 1 | 64 | 1 | 1 | 1 | A/A |
| control-021 | 1 | 62 | 0 | 0 | 1 | A/A |
| control-022 | 1 | 72 | 1 | 0 | 0 | A/A |
| control-023 | 1 | 66 | 0 | 0 | 1 | A/A |
| control-024 | 1 | 29 | 1 | 0 | 1 | G/A |
| control-025 | 2 | 71 | 0 | 0 | 0 | A/A |
| control-026 | 1 | 38 | 0 | 0 | 1 | A/A |
| control-027 | 1 | 71 | 0 | 0 | 1 | G/A |
| control-028 | 1 | 60 | 1 | 0 | 1 | A/A |
| control-029 | 2 | 53 | 0 | 0 | 1 | A/A |

|             |   |    |   |   |   |     |
|-------------|---|----|---|---|---|-----|
| control-030 | 1 | 58 | 0 | 0 | 0 | A/A |
| control-031 | 2 | 52 | 0 | 0 | 0 | A/A |
| control-032 | 1 | 67 | 1 | 0 | 0 | A/A |
| control-033 | 2 | 69 | 0 | 0 | 1 | A/A |
| control-034 | 1 | 80 | 0 | 0 | 1 | G/A |
| control-035 | 1 | 77 | 1 | 0 | 1 | A/A |
| control-036 | 2 | 38 | 0 | 0 | 0 | A/A |
| control-037 | 1 | 28 | 0 | 0 | 0 | G/A |
| control-038 | 2 | 65 | 0 | 0 | 1 | A/A |
| control-039 | 2 | 52 | 0 | 0 | 0 | A/A |
| control-040 | 1 | 66 | 0 | 0 | 0 | A/A |
| control-041 | 2 | 46 | 0 | 0 | 0 | G/A |
| control-042 | 1 | 56 | 1 | 0 | 1 | A/A |
| control-043 | 2 | 68 | 0 | 0 | 1 | A/A |
| control-044 | 1 | 59 | 0 | 0 | 0 | A/A |
| control-045 | 1 | 62 | 0 | 0 | 1 | A/A |
| control-046 | 1 | 71 | 0 | 0 | 0 | A/A |
| control-047 | 1 | 60 | 1 | 1 | 0 | A/A |
| control-048 | 1 | 56 | 1 | 0 | 0 | G/A |
| control-049 | 1 | 73 | 1 | 0 | 0 | A/A |
| control-050 | 1 | 60 | 0 | 0 | 0 | A/A |
| control-051 | 2 | 72 | 0 | 0 | 0 | A/A |
| control-052 | 2 | 61 | 0 | 0 | 0 | A/A |
| control-053 | 2 | 66 | 0 | 0 | 0 | A/A |
| control-054 | 1 | 61 | 1 | 0 | 0 | A/A |
| control-055 | 1 | 71 | 1 | 0 | 0 | G/A |
| control-056 | 1 | 77 | 0 | 0 | 0 | A/A |
| control-057 | 1 | 64 | 1 | 0 | 0 | A/A |
| control-058 | 2 | 54 | 0 | 0 | 0 | G/A |
| control-059 | 1 | 63 | 0 | 0 | 0 | A/A |
| control-060 | 2 | 56 | 0 | 0 | 0 | A/A |
| control-061 | 1 | 63 | 1 | 0 | 0 | G/G |
| control-062 | 2 | 71 | 0 | 0 | 1 | A/A |
| control-063 | 1 | 72 | 1 | 0 | 0 | A/A |
| control-064 | 1 | 46 | 0 | 0 | 0 | A/A |
| control-065 | 1 | 62 | 1 | 0 | 0 | A/A |
| control-066 | 2 | 59 | 0 | 0 | 0 | A/A |
| control-067 | 2 | 79 | 0 | 0 | 0 | A/A |
| control-068 | 2 | 60 | 0 | 0 | 1 | A/A |
| control-069 | 2 | 52 | 0 | 0 | 1 | A/A |
| control-070 | 1 | 56 | 1 | 0 | 0 | A/A |
| control-071 | 1 | 59 | 1 | 0 | 0 | G/A |
| control-072 | 1 | 61 | 0 | 0 | 1 | A/A |
| control-073 | 1 | 63 | 0 | 0 | 1 | A/A |
| control-074 | 1 | 75 | 1 | 0 | 1 | A/A |
| control-075 | 1 | 72 | 0 | 0 | 0 | G/A |
| control-076 | 1 | 64 | 0 | 1 | 0 | A/A |
| control-077 | 2 | 67 | 0 | 0 | 1 | A/A |
| control-078 | 1 | 58 | 1 | 0 | 0 | A/A |
| control-079 | 1 | 70 | 1 | 1 | 1 | A/A |
| control-080 | 1 | 58 | 0 | 0 | 0 | A/A |
| control-081 | 1 | 78 | 0 | 0 | 1 | G/A |
| control-082 | 2 | 61 | 0 | 0 | 0 | A/A |
| control-083 | 1 | 67 | 0 | 0 | 1 | G/A |
| control-084 | 1 | 41 | 1 | 0 | 1 | A/A |
| control-085 | 2 | 69 | 0 | 0 | 0 | A/A |
| control-086 | 1 | 62 | 0 | 0 | 0 | A/A |
| control-087 | 1 | 69 | 0 | 0 | 0 | A/A |

|             |   |    |   |   |   |     |
|-------------|---|----|---|---|---|-----|
| control-088 | 1 | 81 | 0 | 0 | 0 | A/A |
| control-089 | 1 | 57 | 1 | 0 | 0 | G/A |
| control-090 | 2 | 51 | 0 | 0 | 1 | A/A |
| control-091 | 1 | 55 | 1 | 0 | 0 | A/A |
| control-092 | 2 | 37 | 0 | 0 | 0 | A/A |
| control-093 | 1 | 65 | 1 | 1 | 0 | A/A |
| control-094 | 1 | 57 | 0 | 0 | 1 | G/A |
| control-095 | 1 | 80 | 0 | 0 | 0 | A/A |
| control-096 | 2 | 49 | 0 | 0 | 0 | A/A |
| control-097 | 2 | 46 | 0 | 0 | 0 | A/A |
| control-098 | 1 | 65 | 0 | 0 | 0 | A/A |
| control-099 | 2 | 64 | 0 | 0 | 1 | G/A |
| control-100 | 2 | 65 | 0 | 0 | 0 | A/A |
| control-101 | 1 | 69 | 1 | 0 | 0 | A/A |
| control-102 | 1 | 78 | 0 | 0 | 1 | A/A |
| control-103 | 1 | 43 | 0 | 0 | 0 | A/A |
| control-104 | 1 | 64 | 0 | 0 | 0 | G/A |
| control-105 | 2 | 56 | 0 | 0 | 1 | G/A |
| control-106 | 2 | 78 | 0 | 0 | 1 | A/A |
| control-107 | 2 | 52 | 0 | 0 | 1 | A/A |
| control-108 | 2 | 57 | 0 | 0 | 0 | A/A |
| control-109 | 2 | 80 | 0 | 0 | 1 | A/A |
| control-110 | 2 | 73 | 0 | 0 | 0 | G/A |
| control-111 | 2 | 67 | 0 | 0 | 0 | G/A |
| control-112 | 2 | 53 | 0 | 0 | 0 | A/A |
| control-113 | 1 | 48 | 1 | 0 | 1 | A/A |
| control-114 | 1 | 57 | 1 | 0 | 0 | A/A |
| control-115 | 1 | 62 | 1 | 0 | 1 | A/A |
| control-116 | 2 | 71 | 0 | 0 | 0 | A/A |
| control-117 | 1 | 69 | 1 | 1 | 0 | G/A |
| control-118 | 2 | 53 | 0 | 0 | 0 | A/A |
| control-119 | 1 | 75 | 0 | 0 | 1 | A/A |
| control-120 | 2 | 49 | 0 | 0 | 1 | G/A |
| control-121 | 2 | 61 | 0 | 0 | 0 | A/A |
| control-122 | 2 | 62 | 0 | 0 | 1 | A/A |
| control-123 | 1 | 53 | 1 | 0 | 1 | A/A |
| control-124 | 1 | 62 | 0 | 0 | 1 | G/A |
| control-125 | 2 | 78 | 0 | 0 | 1 | A/A |
| control-126 | 1 | 63 | 0 | 0 | 0 | A/A |
| control-127 | 1 | 33 | 0 | 0 | 0 | A/A |
| control-128 | 1 | 81 | 0 | 0 | 1 | A/A |
| control-129 | 2 | 59 | 0 | 0 | 1 | A/A |
| control-130 | 2 | 70 | 0 | 0 | 0 | G/A |
| control-131 | 2 | 56 | 0 | 0 | 0 | A/A |
| control-132 | 1 | 69 | 0 | 0 | 1 | A/A |
| control-133 | 1 | 58 | 0 | 0 | 0 | A/A |
| control-134 | 1 | 60 | 1 | 0 | 0 | A/A |
| control-135 | 1 | 59 | 0 | 0 | 1 | A/A |
| control-136 | 1 | 76 | 1 | 0 | 0 | G/G |
| control-137 | 1 | 52 | 0 | 0 | 0 | A/A |
| control-138 | 2 | 34 | 0 | 0 | 0 | A/A |
| control-139 | 1 | 60 | 1 | 0 | 1 | A/A |
| control-140 | 1 | 76 | 1 | 0 | 0 | A/A |
| control-141 | 1 | 81 | 1 | 0 | 0 | A/A |
| control-142 | 2 | 50 | 0 | 0 | 1 | G/A |
| control-143 | 1 | 57 | 0 | 0 | 0 | A/A |
| control-144 | 1 | 51 | 0 | 0 | 0 | G/G |
| control-145 | 1 | 76 | 0 | 0 | 0 | A/A |

|             |   |    |   |   |   |     |
|-------------|---|----|---|---|---|-----|
| control-146 | 1 | 64 | 0 | 0 | 0 | A/A |
| control-147 | 1 | 60 | 0 | 0 | 0 | A/A |
| control-148 | 2 | 65 | 0 | 0 | 1 | A/A |
| control-149 | 1 | 55 | 0 | 0 | 1 | G/A |
| control-150 | 2 | 70 | 0 | 0 | 0 | A/A |
| control-151 | 1 | 38 | 1 | 0 | 0 | A/A |
| control-152 | 1 | 64 | 0 | 0 | 1 | A/A |
| control-153 | 1 | 62 | 0 | 0 | 0 | A/A |
| control-154 | 1 | 54 | 1 | 0 | 0 | G/A |
| control-155 | 1 | 64 | 0 | 0 | 0 | A/A |
| control-156 | 1 | 56 | 0 | 0 | 0 | A/A |
| control-157 | 2 | 60 | 0 | 0 | 1 | A/A |
| control-158 | 1 | 64 | 0 | 0 | 0 | A/A |
| control-159 | 1 | 78 | 0 | 0 | 1 | G/A |
| control-160 | 1 | 58 | 0 | 0 | 0 | A/A |
| control-161 | 1 | 46 | 0 | 0 | 0 | A/A |
| control-162 | 2 | 72 | 0 | 0 | 0 | G/A |
| control-163 | 1 | 44 | 1 | 0 | 1 | A/A |
| control-164 | 2 | 41 | 0 | 0 | 0 | A/A |
| control-165 | 1 | 46 | 1 | 0 | 1 | G/A |
| control-166 | 1 | 82 | 1 | 0 | 0 | A/A |
| control-167 | 2 | 67 | 0 | 0 | 0 | G/A |
| control-168 | 2 | 65 | 0 | 0 | 0 | G/A |
| control-169 | 2 | 66 | 0 | 0 | 1 | G/A |
| control-170 | 1 | 61 | 1 | 0 | 0 | A/A |
| control-171 | 1 | 52 | 0 | 0 | 0 | A/A |
| control-172 | 2 | 67 | 0 | 0 | 1 | A/A |
| control-173 | 1 | 60 | 1 | 0 | 1 | A/A |
| control-174 | 1 | 56 | 1 | 0 | 0 | A/A |
| control-175 | 1 | 60 | 0 | 0 | 1 | G/A |
| control-176 | 1 | 57 | 0 | 0 | 1 | A/A |
| control-177 | 2 | 65 | 0 | 0 | 0 | A/A |
| control-178 | 2 | 70 | 0 | 0 | 0 | G/G |
| control-179 | 2 | 69 | 0 | 0 | 1 | G/A |
| control-180 | 1 | 74 | 0 | 0 | 0 | G/A |
| control-181 | 1 | 63 | 1 | 0 | 1 | A/A |
| control-182 | 1 | 53 | 1 | 0 | 0 | A/A |
| control-183 | 2 | 25 | 0 | 0 | 0 | A/A |
| control-184 | 2 | 79 | 0 | 0 | 0 | A/A |
| control-185 | 2 | 43 | 0 | 0 | 0 | A/A |
| control-186 | 1 | 62 | 1 | 0 | 1 | G/A |
| control-187 | 2 | 74 | 0 | 0 | 1 | G/A |
| control-188 | 2 | 73 | 0 | 0 | 0 | G/G |
| control-189 | 2 | 62 | 0 | 0 | 0 | A/A |
| control-190 | 1 | 74 | 1 | 0 | 0 | G/A |
| control-191 | 1 | 58 | 0 | 0 | 0 | A/A |
| control-192 | 2 | 69 | 0 | 0 | 1 | A/A |
| control-193 | 2 | 51 | 0 | 0 | 0 | A/A |
| control-194 | 1 | 61 | 0 | 0 | 1 | A/A |
| control-195 | 1 | 66 | 0 | 0 | 1 | A/A |
| control-196 | 1 | 74 | 1 | 0 | 0 | A/A |
| control-197 | 1 | 55 | 0 | 0 | 1 | A/A |
| control-198 | 2 | 72 | 0 | 0 | 0 | A/A |
| control-199 | 1 | 56 | 0 | 0 | 0 | A/A |
| control-200 | 2 | 78 | 0 | 0 | 1 | G/A |
| control-201 | 1 | 43 | 0 | 0 | 1 | A/A |
| control-202 | 2 | 63 | 0 | 0 | 1 | G/A |
| control-203 | 2 | 61 | 0 | 0 | 1 | A/A |

|             |   |    |   |   |   |     |
|-------------|---|----|---|---|---|-----|
| control-204 | 1 | 59 | 1 | 0 | 1 | A/A |
| control-205 | 1 | 60 | 1 | 0 | 0 | A/A |
| control-206 | 1 | 77 | 0 | 0 | 1 | A/A |
| control-207 | 1 | 79 | 0 | 0 | 1 | G/A |
| control-208 | 2 | 63 | 0 | 0 | 1 | A/A |
| control-209 | 2 | 39 | 0 | 0 | 1 | A/A |
| control-210 | 1 | 42 | 0 | 0 | 1 | A/A |
| control-211 | 1 | 68 | 0 | 1 | 0 | A/A |
| control-212 | 1 | 58 | 0 | 0 | 0 | A/A |
| control-213 | 1 | 54 | 0 | 0 | 0 | A/A |
| control-214 | 1 | 57 | 1 | 0 | 1 | A/A |
| control-215 | 1 | 66 | 0 | 0 | 0 | G/A |
| control-216 | 1 | 74 | 0 | 0 | 1 | A/A |
| control-217 | 2 | 50 | 0 | 0 | 0 | A/A |
| control-218 | 1 | 68 | 1 | 0 | 1 | A/A |
| control-219 | 1 | 60 | 0 | 0 | 1 | G/A |
| control-220 | 1 | 44 | 1 | 0 | 1 | G/A |
| control-221 | 2 | 59 | 0 | 0 | 1 | G/A |
| control-222 | 1 | 73 | 0 | 0 | 1 | A/A |
| control-223 | 1 | 75 | 1 | 0 | 1 | A/A |
| control-224 | 1 | 65 | 0 | 0 | 0 | G/A |
| control-225 | 1 | 62 | 1 | 0 | 0 | A/A |
| control-226 | 1 | 57 | 0 | 0 | 0 | A/A |
| control-227 | 2 | 76 | 0 | 0 | 1 | A/A |
| control-228 | 1 | 46 | 0 | 0 | 1 | A/A |
| control-229 | 1 | 47 | 1 | 0 | 1 | A/A |
| control-230 | 2 | 60 | 0 | 0 | 1 | A/A |
| control-231 | 1 | 59 | 0 | 0 | 0 | A/A |
| control-232 | 2 | 52 | 0 | 0 | 0 | A/A |
| control-233 | 1 | 52 | 0 | 0 | 1 | A/A |
| control-234 | 1 | 76 | 0 | 0 | 1 | A/A |
| control-235 | 1 | 75 | 0 | 0 | 1 | A/A |
| control-236 | 2 | 51 | 0 | 0 | 1 | A/A |
| control-237 | 1 | 66 | 0 | 0 | 1 | A/A |
| control-238 | 1 | 47 | 1 | 0 | 1 | G/A |
| control-239 | 2 | 61 | 0 | 0 | 0 | A/A |
| control-240 | 1 | 44 | 0 | 0 | 0 | A/A |
| control-241 | 2 | 62 | 0 | 0 | 1 | A/A |
| control-242 | 1 | 40 | 0 | 0 | 1 | A/A |
| control-243 | 1 | 50 | 0 | 1 | 1 | A/A |
| control-244 | 2 | 59 | 0 | 0 | 0 | G/A |
| control-245 | 1 | 48 | 0 | 0 | 1 | A/A |
| control-246 | 1 | 74 | 1 | 1 | 1 | A/A |
| control-247 | 1 | 57 | 0 | 0 | 0 | G/A |
| control-248 | 1 | 69 | 1 | 0 | 1 | A/A |
| control-249 | 1 | 62 | 0 | 0 | 1 | A/A |
| control-250 | 2 | 57 | 0 | 0 | 1 | A/A |
| control-251 | 1 | 37 | 0 | 0 | 0 | A/A |
| control-252 | 1 | 64 | 0 | 0 | 1 | A/A |
| control-253 | 1 | 64 | 0 | 0 | 0 | A/A |
| control-254 | 1 | 45 | 0 | 0 | 1 | A/A |
| control-255 | 1 | 77 | 0 | 0 | 0 | G/A |
| control-256 | 1 | 60 | 0 | 0 | 0 | A/A |
| control-257 | 1 | 68 | 0 | 0 | 0 | G/A |
| control-258 | 1 | 49 | 1 | 1 | 0 | G/A |
| control-259 | 1 | 49 | 0 | 0 | 0 | G/A |
| control-260 | 1 | 43 | 0 | 0 | 1 | A/A |
| control-261 | 1 | 81 | 0 | 0 | 1 | G/A |



|             |   |    |   |   |   |     |
|-------------|---|----|---|---|---|-----|
| control-262 | 1 | 46 | 0 | 0 | 1 | A/A |
| control-263 | 2 | 55 | 0 | 0 | 1 | A/A |
| control-264 | 1 | 79 | 1 | 1 | 0 | G/A |
| control-265 | 1 | 71 | 1 | 1 | 0 | A/A |
| control-266 | 1 | 64 | 0 | 0 | 0 | A/A |
| control-267 | 2 | 57 | 0 | 0 | 0 | G/A |
| control-268 | 2 | 78 | 0 | 0 | 1 | G/A |
| control-269 | 1 | 58 | 1 | 0 | 1 | A/A |
| control-270 | 1 | 74 | 0 | 0 | 0 | A/A |
| control-271 | 1 | 41 | 0 | 0 | 1 | A/A |
| control-272 | 2 | 54 | 0 | 0 | 1 | A/A |
| control-273 | 1 | 59 | 1 | 1 | 0 | A/A |
| control-274 | 1 | 70 | 0 | 0 | 0 | A/A |
| control-275 | 1 | 55 | 1 | 0 | 1 | G/A |
| control-276 | 1 | 35 | 0 | 0 | 0 | G/A |
| control-277 | 1 | 58 | 0 | 0 | 0 | A/A |
| control-278 | 1 | 59 | 0 | 0 | 1 | A/A |
| control-279 | 1 | 60 | 0 | 0 | 0 | G/A |
| control-280 | 1 | 58 | 0 | 0 | 0 | A/A |
| control-281 | 2 | 60 | 0 | 0 | 0 | A/A |
| control-282 | 2 | 61 | 0 | 0 | 0 | A/A |
| control-283 | 2 | 67 | 0 | 0 | 0 | G/A |
| control-284 | 1 | 59 | 1 | 0 | 1 | A/A |
| control-285 | 2 | 55 | 0 | 0 | 0 | A/A |
| control-286 | 1 | 66 | 0 | 0 | 0 | A/A |
| control-287 | 1 | 64 | 0 | 0 | 1 | A/A |
| control-288 | 1 | 71 | 0 | 0 | 0 | A/A |
| control-289 | 1 | 56 | 1 | 0 | 1 | A/A |
| control-290 | 2 | 61 | 0 | 0 | 1 | A/A |
| control-291 | 1 | 73 | 1 | 0 | 0 | A/A |
| control-292 | 1 | 60 | 1 | 0 | 0 | G/A |
| control-293 | 2 | 66 | 0 | 0 | 0 | G/A |
| control-294 | 2 | 63 | 0 | 0 | 1 | G/A |
| control-295 | 1 | 65 | 1 | 0 | 1 | A/A |
| control-296 | 1 | 60 | 0 | 0 | 0 | G/A |
| control-297 | 2 | 51 | 0 | 0 | 0 | A/A |
| control-298 | 1 | 57 | 0 | 0 | 1 | A/A |
| control-299 | 2 | 79 | 0 | 0 | 1 | G/A |
| control-300 | 1 | 55 | 1 | 1 | 0 | A/A |
| control-301 | 1 | 51 | 0 | 0 | 1 | A/A |
| control-302 | 2 | 66 | 0 | 0 | 0 | A/A |
| control-303 | 1 | 53 | 1 | 0 | 0 | A/A |
| control-304 | 1 | 61 | 0 | 0 | 1 | G/G |
| control-305 | 2 | 79 | 0 | 0 | 0 | G/A |
| control-306 | 1 | 62 | 0 | 0 | 1 | A/A |
| control-307 | 1 | 60 | 1 | 0 | 1 | G/A |
| control-308 | 1 | 71 | 1 | 1 | 1 | G/A |
| control-309 | 1 | 67 | 0 | 0 | 0 | A/A |
| control-310 | 2 | 69 | 0 | 0 | 0 | A/A |
| control-311 | 1 | 62 | 0 | 0 | 0 | A/A |
| control-312 | 1 | 61 | 1 | 0 | 0 | G/A |
| control-313 | 1 | 62 | 1 | 0 | 0 | A/A |
| control-314 | 2 | 70 | 0 | 0 | 1 | A/A |
| control-315 | 2 | 56 | 0 | 0 | 1 | A/A |
| control-316 | 2 | 68 | 0 | 0 | 1 | G/A |
| control-317 | 2 | 53 | 0 | 0 | 1 | A/A |
| control-318 | 2 | 56 | 0 | 0 | 1 | A/A |
| control-319 | 2 | 48 | 0 | 0 | 0 | A/A |

|             |   |    |   |   |   |     |
|-------------|---|----|---|---|---|-----|
| control-320 | 1 | 43 | 1 | 0 | 0 | A/A |
| control-321 | 1 | 61 | 0 | 0 | 1 | G/A |
| control-322 | 1 | 67 | 0 | 0 | 1 | A/A |
| control-323 | 1 | 57 | 0 | 0 | 0 | A/A |
| control-324 | 1 | 39 | 0 | 0 | 1 | A/A |
| control-325 | 1 | 63 | 0 | 0 | 0 | A/A |
| control-326 | 1 | 74 | 1 | 0 | 0 | G/A |
| control-327 | 1 | 76 | 0 | 0 | 1 | A/A |
| control-328 | 1 | 67 | 0 | 0 | 0 | A/A |
| control-329 | 1 | 61 | 0 | 0 | 0 | A/A |
| control-330 | 1 | 74 | 0 | 1 | 0 | G/A |
| control-331 | 2 | 65 | 0 | 0 | 1 | A/A |
| control-332 | 1 | 71 | 1 | 0 | 0 | A/A |
| control-333 | 1 | 59 | 1 | 0 | 0 | G/A |
| control-334 | 1 | 69 | 1 | 0 | 0 | A/A |
| control-335 | 2 | 78 | 0 | 0 | 0 | A/A |
| control-336 | 1 | 59 | 0 | 0 | 1 | A/A |
| control-337 | 1 | 63 | 1 | 0 | 1 | G/A |
| control-338 | 1 | 82 | 1 | 0 | 0 | G/A |
| control-339 | 2 | 63 | 0 | 0 | 1 | G/A |
| control-340 | 1 | 71 | 1 | 0 | 1 | G/A |
| control-341 | 1 | 64 | 0 | 1 | 0 | A/A |
| control-342 | 1 | 56 | 0 | 0 | 0 | G/A |
| control-343 | 2 | 72 | 0 | 0 | 1 | A/A |
| control-344 | 1 | 62 | 1 | 0 | 0 | A/A |
| control-345 | 2 | 51 | 0 | 0 | 0 | A/A |
| control-346 | 1 | 58 | 1 | 0 | 0 | G/A |
| control-347 | 1 | 60 | 0 | 0 | 0 | G/A |
| control-348 | 2 | 66 | 0 | 0 | 0 | G/A |
| control-349 | 2 | 70 | 0 | 0 | 0 | G/A |
| control-350 | 2 | 81 | 0 | 0 | 1 | G/A |
| control-351 | 1 | 57 | 0 | 0 | 1 | A/A |
| control-352 | 2 | 61 | 0 | 0 | 0 | G/A |
| control-353 | 2 | 59 | 0 | 0 | 0 | A/A |
| control-354 | 1 | 79 | 0 | 0 | 0 | A/A |
| control-355 | 2 | 54 | 0 | 0 | 0 | A/A |
| control-356 | 1 | 64 | 0 | 0 | 0 | A/A |
| control-357 | 2 | 48 | 0 | 0 | 1 | A/A |
| control-358 | 1 | 74 | 1 | 0 | 1 | A/A |
| control-359 | 1 | 63 | 1 | 0 | 0 | A/A |
| control-360 | 2 | 69 | 0 | 0 | 0 | A/A |
| control-361 | 2 | 74 | 0 | 0 | 1 | G/A |
| control-362 | 1 | 59 | 0 | 0 | 1 | A/A |
| control-363 | 2 | 63 | 0 | 0 | 1 | A/A |
| control-364 | 1 | 73 | 0 | 0 | 1 | G/A |
| control-365 | 2 | 68 | 0 | 0 | 0 | A/A |
| control-366 | 1 | 76 | 0 | 0 | 0 | A/A |
| control-367 | 1 | 65 | 0 | 0 | 0 | G/A |
| control-368 | 1 | 73 | 0 | 0 | 1 | G/G |
| control-369 | 2 | 59 | 0 | 0 | 0 | A/A |
| control-370 | 1 | 65 | 1 | 0 | 0 | A/A |
| control-371 | 1 | 66 | 0 | 0 | 0 | G/A |
| control-372 | 2 | 67 | 0 | 0 | 0 | A/A |
| control-373 | 2 | 55 | 0 | 0 | 0 | A/A |
| control-374 | 1 | 78 | 0 | 0 | 1 | G/A |
| control-375 | 1 | 71 | 0 | 0 | 1 | G/A |
| control-376 | 2 | 67 | 0 | 0 | 0 | A/A |
| control-377 | 1 | 53 | 0 | 0 | 1 | A/A |

|             |   |    |   |   |   |     |
|-------------|---|----|---|---|---|-----|
| control-378 | 2 | 67 | 0 | 0 | 1 | A/A |
| control-379 | 2 | 68 | 0 | 0 | 1 | G/A |
| control-380 | 2 | 82 | 0 | 0 | 0 | G/A |
| control-381 | 1 | 55 | 1 | 0 | 0 | A/A |
| control-382 | 2 | 63 | 0 | 0 | 1 | A/A |
| control-383 | 1 | 38 | 0 | 0 | 1 | A/A |
| control-384 | 2 | 72 | 0 | 0 | 0 | A/A |
| control-385 | 1 | 56 | 1 | 0 | 1 | A/A |
| control-386 | 1 | 80 | 0 | 0 | 0 | A/A |
| control-387 | 1 | 56 | 0 | 0 | 1 | A/A |
| control-388 | 1 | 65 | 0 | 0 | 0 | A/A |
| control-389 | 1 | 59 | 0 | 0 | 1 | A/A |
| control-390 | 1 | 72 | 0 | 0 | 0 | A/A |
| control-391 | 1 | 59 | 1 | 0 | 1 | A/A |
| control-392 | 1 | 77 | 1 | 0 | 0 | A/A |
| control-393 | 1 | 60 | 0 | 0 | 0 | G/A |
| control-394 | 1 | 56 | 1 | 0 | 0 | G/A |
| control-395 | 1 | 49 | 0 | 0 | 0 | A/A |
| control-396 | 1 | 62 | 0 | 0 | 0 | A/A |
| control-397 | 2 | 68 | 0 | 0 | 0 | A/A |
| control-398 | 1 | 70 | 1 | 0 | 1 | G/A |
| control-399 | 2 | 65 | 0 | 0 | 1 | A/A |
| control-400 | 2 | 77 | 0 | 0 | 1 | A/A |
| control-401 | 1 | 49 | 1 | 0 | 0 | A/A |
| control-402 | 1 | 71 | 1 | 0 | 1 | A/A |
| control-403 | 1 | 52 | 0 | 0 | 0 | A/A |
| control-404 | 1 | 47 | 0 | 0 | 0 | G/A |
| control-405 | 1 | 48 | 0 | 0 | 1 | A/A |
| control-406 | 2 | 46 | 0 | 0 | 0 | A/A |
| control-407 | 2 | 51 | 0 | 0 | 0 | G/A |
| control-408 | 1 | 67 | 1 | 0 | 1 | A/A |
| control-409 | 1 | 78 | 0 | 0 | 0 | A/A |
| control-410 | 1 | 48 | 1 | 0 | 0 | G/A |
| control-411 | 2 | 56 | 0 | 0 | 0 | A/A |
| control-412 | 2 | 51 | 0 | 0 | 1 | A/A |
| control-413 | 1 | 82 | 0 | 0 | 1 | G/A |
| control-414 | 2 | 63 | 0 | 0 | 1 | A/A |
| control-415 | 2 | 54 | 0 | 0 | 1 | A/A |
| control-416 | 2 | 52 | 0 | 0 | 1 | A/A |
| control-417 | 1 | 52 | 0 | 0 | 1 | G/A |
| control-418 | 1 | 58 | 1 | 0 | 0 | A/A |
| control-419 | 1 | 78 | 0 | 0 | 0 | A/A |
| control-420 | 1 | 51 | 0 | 0 | 0 | A/A |
| control-421 | 2 | 68 | 0 | 0 | 1 | G/A |
| control-422 | 1 | 52 | 0 | 0 | 0 | A/A |
| control-423 | 2 | 51 | 0 | 0 | 1 | A/A |
| control-424 | 2 | 66 | 0 | 0 | 1 | A/A |
| control-425 | 2 | 62 | 0 | 0 | 0 | A/A |
| control-426 | 1 | 66 | 0 | 0 | 0 | G/A |
| control-427 | 1 | 65 | 0 | 0 | 1 | A/A |
| control-428 | 2 | 60 | 0 | 0 | 0 | A/A |
| control-429 | 1 | 48 | 0 | 0 | 1 | A/A |
| control-430 | 2 | 53 | 0 | 0 | 1 | A/A |
| control-431 | 1 | 70 | 1 | 0 | 1 | A/A |
| control-432 | 2 | 60 | 0 | 0 | 1 | A/A |
| control-433 | 2 | 63 | 0 | 0 | 0 | A/A |
| control-434 | 2 | 61 | 0 | 0 | 1 | A/A |
| control-435 | 1 | 78 | 1 | 0 | 0 | G/A |

|             |   |    |   |   |   |     |
|-------------|---|----|---|---|---|-----|
| control-436 | 1 | 55 | 0 | 0 | 0 | A/A |
| control-437 | 1 | 69 | 0 | 0 | 1 | A/A |
| control-438 | 1 | 67 | 0 | 0 | 1 | G/A |
| control-439 | 1 | 62 | 0 | 0 | 0 | A/A |
| control-440 | 2 | 49 | 0 | 0 | 0 | G/A |
| control-441 | 1 | 55 | 0 | 0 | 1 | A/A |
| control-442 | 1 | 62 | 1 | 0 | 0 | A/A |
| control-443 | 1 | 48 | 1 | 0 | 1 | A/A |
| control-444 | 1 | 49 | 1 | 0 | 1 | G/A |
| control-445 | 1 | 61 | 0 | 0 | 1 | A/A |
| control-446 | 2 | 77 | 0 | 0 | 1 | G/A |
| control-447 | 2 | 53 | 0 | 0 | 0 | A/A |
| control-448 | 1 | 69 | 1 | 0 | 0 | A/A |
| control-449 | 2 | 70 | 0 | 0 | 1 | A/A |
| control-450 | 1 | 52 | 0 | 0 | 0 | A/A |
| control-451 | 2 | 61 | 0 | 0 | 0 | A/A |
| control-452 | 2 | 67 | 0 | 0 | 0 | A/A |
| control-453 | 1 | 30 | 0 | 0 | 0 | G/G |
| control-454 | 1 | 58 | 0 | 0 | 0 | G/A |
| control-455 | 2 | 61 | 0 | 0 | 1 | A/A |
| control-456 | 1 | 75 | 0 | 0 | 0 | A/A |
| control-457 | 1 | 54 | 0 | 0 | 0 | A/A |
| control-458 | 2 | 42 | 0 | 0 | 0 | A/A |
| control-459 | 2 | 61 | 0 | 0 | 0 | G/A |
| control-460 | 1 | 57 | 0 | 0 | 0 | A/A |
| control-461 | 1 | 50 | 1 | 0 | 1 | A/A |
| control-462 | 2 | 66 | 0 | 0 | 0 | A/A |
| control-463 | 1 | 55 | 1 | 0 | 1 | A/A |
| control-464 | 2 | 52 | 0 | 0 | 1 | A/A |
| control-465 | 1 | 41 | 0 | 0 | 0 | A/A |
| control-466 | 2 | 63 | 0 | 0 | 1 | A/A |
| control-467 | 1 | 59 | 0 | 0 | 1 | A/A |
| control-468 | 1 | 74 | 1 | 1 | 0 | A/A |
| control-469 | 1 | 68 | 0 | 0 | 0 | G/A |
| control-470 | 1 | 63 | 1 | 1 | 1 | G/A |
| control-471 | 1 | 60 | 1 | 0 | 0 | G/A |
| control-472 | 1 | 59 | 0 | 0 | 1 | G/A |
| control-473 | 2 | 57 | 0 | 0 | 1 | A/A |
| control-474 | 1 | 60 | 1 | 0 | 1 | G/A |
| control-475 | 2 | 42 | 0 | 0 | 0 | A/A |
| control-476 | 1 | 54 | 1 | 0 | 0 | A/A |
| control-477 | 2 | 42 | 0 | 0 | 1 | A/A |
| control-478 | 1 | 51 | 0 | 0 | 0 | A/A |
| control-479 | 1 | 50 | 0 | 0 | 1 | A/A |
| control-480 | 1 | 58 | 0 | 0 | 1 | G/A |
| control-481 | 2 | 65 | 1 | 0 | 1 | G/A |
| control-482 | 2 | 73 | 0 | 0 | 0 | G/G |
| control-483 | 1 | 51 | 0 | 0 | 0 | A/A |
| control-484 | 1 | 64 | 0 | 0 | 1 | A/A |
| control-485 | 1 | 27 | 0 | 0 | 0 | G/A |
| control-486 | 1 | 63 | 1 | 0 | 0 | A/A |
| control-487 | 1 | 53 | 1 | 0 | 0 | A/A |
| control-488 | 2 | 64 | 0 | 0 | 0 | A/A |
| control-489 | 1 | 55 | 1 | 0 | 0 | A/A |
| control-490 | 1 | 39 | 1 | 0 | 0 | G/A |
| control-491 | 1 | 69 | 0 | 0 | 1 | A/A |
| control-492 | 1 | 50 | 1 | 0 | 0 | A/A |
| control-493 | 1 | 76 | 1 | 0 | 0 | A/A |

|             |   |    |   |   |   |     |
|-------------|---|----|---|---|---|-----|
| control-494 | 1 | 79 | 1 | 0 | 0 | A/A |
| control-495 | 1 | 52 | 1 | 0 | 0 | A/A |
| control-496 | 2 | 79 | 0 | 0 | 1 | A/A |
| control-497 | 2 | 58 | 0 | 0 | 1 | A/A |
| control-498 | 1 | 43 | 0 | 0 | 0 | A/A |
| control-499 | 2 | 53 | 0 | 0 | 0 | A/A |
| control-500 | 2 | 71 | 0 | 0 | 1 | G/A |
| control-501 | 1 | 78 | 0 | 0 | 0 | G/A |
| control-502 | 1 | 63 | 1 | 0 | 0 | G/A |
| control-503 | 1 | 57 | 1 | 0 | 1 | G/A |
| control-504 | 2 | 60 | 0 | 0 | 0 | A/A |
| control-505 | 1 | 67 | 0 | 0 | 1 | G/A |
| control-506 | 1 | 66 | 0 | 0 | 1 | A/A |
| control-507 | 1 | 62 | 0 | 0 | 1 | G/A |
| control-508 | 2 | 61 | 0 | 0 | 1 | A/A |
| control-509 | 1 | 61 | 1 | 0 | 1 | A/A |
| control-510 | 1 | 66 | 0 | 0 | 1 | A/A |
| control-511 | 1 | 52 | 0 | 0 | 1 | G/A |
| control-512 | 2 | 71 | 0 | 0 | 1 | A/A |
| control-513 | 2 | 73 | 0 | 0 | 1 | G/A |
| control-514 | 1 | 60 | 1 | 0 | 0 | G/A |
| control-515 | 1 | 72 | 1 | 1 | 0 | A/A |
| control-516 | 1 | 70 | 0 | 0 | 0 | A/A |
| control-517 | 1 | 68 | 0 | 0 | 0 | A/A |
| control-518 | 1 | 71 | 1 | 0 | 0 | A/A |
| control-519 | 2 | 69 | 0 | 0 | 1 | A/A |
| control-520 | 2 | 61 | 0 | 0 | 1 | G/A |
| control-521 | 1 | 69 | 0 | 0 | 1 | A/A |
| control-522 | 1 | 74 | 1 | 0 | 1 | A/A |
| control-523 | 2 | 52 | 0 | 0 | 1 | A/A |
| control-524 | 1 | 41 | 0 | 0 | 0 | A/A |
| control-525 | 1 | 52 | 0 | 0 | 0 | A/A |
| control-526 | 2 | 44 | 0 | 0 | 0 | G/G |
| control-527 | 2 | 50 | 0 | 0 | 0 | A/A |
| control-528 | 1 | 63 | 0 | 0 | 1 | G/A |
| control-529 | 1 | 59 | 1 | 0 | 1 | A/A |
| control-530 | 1 | 44 | 0 | 0 | 1 | G/A |
| control-531 | 2 | 66 | 0 | 0 | 0 | G/A |
| control-532 | 1 | 59 | 1 | 1 | 0 | A/A |
| control-533 | 1 | 61 | 1 | 0 | 1 | G/A |
| control-534 | 2 | 53 | 0 | 0 | 1 | A/A |
| control-535 | 1 | 66 | 1 | 0 | 1 | A/A |
| control-536 | 2 | 54 | 0 | 0 | 0 | A/A |
| control-537 | 2 | 51 | 0 | 0 | 1 | G/A |
| control-538 | 2 | 61 | 0 | 0 | 0 | A/A |
| control-539 | 1 | 56 | 0 | 0 | 1 | A/A |
| control-540 | 1 | 52 | 0 | 0 | 1 | G/A |
| control-541 | 2 | 49 | 0 | 0 | 1 | A/A |
| control-542 | 2 | 48 | 0 | 0 | 0 | A/A |
| control-543 | 2 | 45 | 0 | 0 | 1 | A/A |
| control-544 | 2 | 47 | 0 | 0 | 0 | G/A |
| control-545 | 2 | 65 | 0 | 0 | 1 | A/A |
| control-546 | 1 | 73 | 1 | 0 | 0 | A/A |
| control-547 | 2 | 59 | 0 | 0 | 0 | A/A |
| control-548 | 1 | 59 | 0 | 0 | 0 | G/A |
| control-549 | 1 | 79 | 0 | 0 | 1 | A/A |
| control-550 | 1 | 67 | 0 | 0 | 0 | A/A |
| control-551 | 1 | 78 | 0 | 0 | 0 | G/A |

|             |   |    |   |   |   |     |
|-------------|---|----|---|---|---|-----|
| control-552 | 1 | 59 | 0 | 0 | 1 | G/A |
| control-553 | 1 | 71 | 0 | 0 | 0 | A/A |
| control-554 | 1 | 59 | 0 | 0 | 1 | A/A |
| control-555 | 1 | 47 | 1 | 0 | 1 | A/A |
| control-556 | 2 | 68 | 0 | 0 | 0 | A/A |
| control-557 | 1 | 64 | 0 | 1 | 0 | A/A |
| control-558 | 2 | 50 | 0 | 0 | 1 | G/A |
| control-559 | 1 | 74 | 1 | 0 | 0 | A/A |
| control-560 | 2 | 50 | 0 | 0 | 0 | A/A |
| control-561 | 1 | 70 | 0 | 0 | 0 | A/A |
| control-562 | 2 | 73 | 0 | 0 | 1 | A/A |
| control-563 | 1 | 82 | 0 | 0 | 0 | G/A |
| control-564 | 2 | 63 | 0 | 0 | 0 | A/A |
| control-565 | 1 | 53 | 0 | 0 | 0 | A/A |
| control-566 | 2 | 59 | 0 | 0 | 0 | G/A |
| control-567 | 1 | 58 | 0 | 0 | 0 | G/A |
| control-568 | 1 | 68 | 0 | 0 | 0 | A/A |
| control-569 | 2 | 53 | 0 | 0 | 1 | A/A |
| control-570 | 2 | 65 | 0 | 0 | 1 | G/A |
| control-571 | 2 | 73 | 0 | 0 | 1 | A/A |
| control-572 | 1 | 73 | 1 | 0 | 0 | A/A |
| control-573 | 1 | 77 | 1 | 0 | 1 | A/A |
| control-574 | 2 | 56 | 0 | 0 | 1 | A/A |
| control-575 | 1 | 59 | 0 | 0 | 0 | A/A |
| control-576 | 2 | 51 | 0 | 0 | 1 | A/A |
| control-577 | 1 | 62 | 0 | 0 | 1 | G/A |
| control-578 | 1 | 55 | 0 | 0 | 0 | A/A |
| control-579 | 2 | 59 | 0 | 0 | 1 | A/A |
| control-580 | 1 | 62 | 0 | 0 | 1 | A/A |
| control-581 | 1 | 69 | 0 | 0 | 0 | G/A |
| control-582 | 1 | 74 | 0 | 0 | 0 | G/A |
| control-583 | 1 | 29 | 0 | 0 | 1 | A/A |
| control-584 | 1 | 59 | 0 | 0 | 0 | A/A |
| control-585 | 1 | 70 | 0 | 0 | 1 | A/A |
| control-586 | 1 | 52 | 1 | 0 | 0 | A/A |
| control-587 | 1 | 60 | 0 | 0 | 1 | A/A |
| control-588 | 2 | 61 | 0 | 0 | 0 | A/A |
| control-589 | 1 | 69 | 1 | 0 | 1 | A/A |
| control-590 | 2 | 77 | 0 | 0 | 1 | A/A |
| control-591 | 2 | 72 | 0 | 0 | 0 | A/A |
| control-592 | 2 | 77 | 0 | 0 | 0 | A/A |
| control-593 | 2 | 69 | 0 | 0 | 1 | A/A |
| control-594 | 1 | 59 | 0 | 0 | 1 | A/A |
| control-595 | 2 | 63 | 0 | 0 | 1 | A/A |
| control-596 | 2 | 66 | 0 | 0 | 0 | G/A |
| control-597 | 1 | 63 | 0 | 0 | 1 | A/A |
| control-598 | 1 | 76 | 0 | 0 | 0 | G/A |
| control-599 | 1 | 74 | 0 | 0 | 1 | A/A |
| control-600 | 2 | 59 | 0 | 0 | 1 | A/A |
| control-601 | 1 | 73 | 1 | 0 | 1 | A/A |
| control-602 | 1 | 57 | 0 | 0 | 1 | A/A |
| control-603 | 2 | 72 | 0 | 0 | 1 | A/A |
| control-604 | 1 | 63 | 0 | 0 | 0 | A/A |
| control-605 | 2 | 68 | 0 | 0 | 1 | A/A |
| control-606 | 2 | 79 | 0 | 0 | 1 | G/A |
| control-607 | 1 | 76 | 0 | 0 | 1 | G/A |
| control-608 | 1 | 66 | 0 | 0 | 1 | G/A |
| control-609 | 1 | 61 | 1 | 0 | 1 | A/A |

|             |   |    |   |   |   |     |
|-------------|---|----|---|---|---|-----|
| control-610 | 1 | 53 | 0 | 0 | 1 | G/A |
| control-611 | 2 | 58 | 0 | 0 | 0 | A/A |
| control-612 | 2 | 78 | 0 | 0 | 1 | A/A |
| control-613 | 1 | 62 | 0 | 0 | 1 | A/A |
| control-614 | 2 | 66 | 0 | 0 | 1 | A/A |
| control-615 | 1 | 69 | 1 | 0 | 0 | G/A |
| control-616 | 1 | 73 | 0 | 0 | 0 | G/A |
| control-617 | 1 | 76 | 1 | 0 | 0 | G/A |
| control-618 | 1 | 57 | 1 | 0 | 0 | A/A |
| control-619 | 1 | 57 | 1 | 0 | 1 | G/A |
| control-620 | 1 | 46 | 1 | 1 | 1 | G/A |
| control-621 | 2 | 73 | 0 | 0 | 1 | G/A |
| control-622 | 1 | 60 | 1 | 1 | 0 | A/A |
| control-623 | 2 | 65 | 0 | 0 | 0 | G/A |
| control-624 | 1 | 66 | 1 | 0 | 0 | A/A |
| control-625 | 1 | 62 | 0 | 0 | 0 | A/A |
| control-626 | 2 | 71 | 0 | 0 | 0 | G/A |
| control-627 | 2 | 74 | 0 | 0 | 0 | A/A |
| control-628 | 2 | 74 | 0 | 0 | 1 | G/A |
| control-629 | 2 | 71 | 0 | 0 | 0 | A/A |
| control-630 | 1 | 71 | 1 | 0 | 1 | A/A |
| control-631 | 1 | 54 | 1 | 0 | 0 | G/A |
| control-632 | 1 | 78 | 0 | 0 | 0 | A/A |
| control-633 | 1 | 53 | 0 | 0 | 0 | A/A |
| control-634 | 2 | 64 | 0 | 0 | 1 | A/A |
| control-635 | 2 | 71 | 0 | 0 | 1 | A/A |
| control-636 | 2 | 68 | 0 | 0 | 1 | A/A |
| control-637 | 1 | 64 | 1 | 1 | 1 | A/A |
| control-638 | 1 | 55 | 0 | 0 | 1 | A/A |
| control-639 | 2 | 60 | 0 | 0 | 0 | A/A |
| control-640 | 1 | 73 | 1 | 0 | 1 | A/A |
| control-641 | 1 | 68 | 0 | 0 | 0 | A/A |
| control-642 | 1 | 75 | 1 | 0 | 0 | A/A |
| control-643 | 1 | 79 | 0 | 0 | 0 | A/A |
| control-644 | 1 | 59 | 1 | 0 | 0 | A/A |
| control-645 | 1 | 76 | 0 | 0 | 1 | A/A |
| control-646 | 1 | 59 | 1 | 0 | 1 | G/A |
| control-647 | 1 | 63 | 1 | 0 | 0 | A/A |
| control-648 | 1 | 62 | 1 | 1 | 1 | A/A |
| control-649 | 1 | 66 | 1 | 0 | 1 | A/A |
| control-650 | 1 | 53 | 0 | 0 | 1 | A/A |
| control-651 | 1 | 52 | 0 | 0 | 0 | A/A |
| control-652 | 2 | 77 | 0 | 0 | 0 | A/A |
| control-653 | 1 | 81 | 0 | 0 | 0 | A/A |
| control-654 | 1 | 67 | 0 | 0 | 0 | G/A |
| control-655 | 1 | 54 | 1 | 0 | 1 | A/A |
| control-656 | 1 | 55 | 0 | 0 | 0 | A/A |
| control-657 | 2 | 69 | 0 | 0 | 1 | G/A |
| control-658 | 2 | 74 | 0 | 0 | 0 | A/A |
| control-659 | 2 | 76 | 0 | 0 | 1 | G/A |
| control-660 | 1 | 65 | 0 | 1 | 0 | A/A |
| control-661 | 1 | 58 | 1 | 1 | 1 | G/A |
| control-662 | 1 | 68 | 0 | 0 | 1 | A/A |
| control-663 | 1 | 51 | 1 | 0 | 1 | A/A |
| control-664 | 1 | 48 | 1 | 0 | 1 | G/A |
| control-665 | 2 | 54 | 0 | 0 | 0 | A/A |
| control-666 | 1 | 79 | 0 | 1 | 0 | A/A |
| control-667 | 2 | 60 | 0 | 0 | 1 | G/A |

|             |   |    |   |   |   |     |
|-------------|---|----|---|---|---|-----|
| control-668 | 2 | 64 | 0 | 0 | 0 | A/A |
| control-669 | 1 | 66 | 0 | 0 | 1 | A/A |
| control-670 | 1 | 68 | 1 | 0 | 0 | G/A |
| control-671 | 1 | 59 | 1 | 1 | 1 | G/A |
| control-672 | 1 | 67 | 1 | 0 | 0 | G/A |
| control-673 | 2 | 59 | 0 | 0 | 0 | A/A |
| control-674 | 1 | 73 | 0 | 0 | 0 | A/A |
| control-675 | 1 | 56 | 1 | 0 | 0 | A/A |
| control-676 | 1 | 60 | 0 | 0 | 0 | A/A |
| control-677 | 1 | 51 | 0 | 0 | 0 | A/A |
| control-678 | 1 | 58 | 1 | 0 | 0 | A/A |
| control-679 | 1 | 78 | 0 | 0 | 1 | A/A |
| control-680 | 1 | 65 | 0 | 0 | 0 | A/A |
| control-681 | 2 | 71 | 0 | 0 | 0 | A/A |
| control-682 | 1 | 63 | 0 | 0 | 0 | A/A |
| control-683 | 1 | 66 | 0 | 0 | 1 | A/A |
| control-684 | 1 | 78 | 1 | 0 | 0 | A/A |
| control-685 | 2 | 58 | 0 | 0 | 0 | A/A |
| control-686 | 1 | 68 | 0 | 0 | 1 | A/A |
| control-687 | 2 | 61 | 0 | 0 | 0 | A/A |
| control-688 | 1 | 68 | 0 | 0 | 0 | A/A |
| control-689 | 1 | 62 | 1 | 1 | 1 | G/A |
| control-690 | 1 | 69 | 0 | 0 | 0 | A/A |
| control-691 | 1 | 54 | 0 | 0 | 0 | G/A |
| control-692 | 1 | 58 | 0 | 0 | 1 | A/A |
| control-693 | 2 | 60 | 0 | 0 | 1 | A/A |
| control-694 | 1 | 69 | 1 | 1 | 0 | G/A |
| control-695 | 1 | 59 | 1 | 0 | 1 | A/A |
| control-696 | 2 | 59 | 0 | 0 | 1 | A/A |
| control-697 | 1 | 64 | 0 | 0 | 1 | A/A |
| control-698 | 1 | 58 | 1 | 0 | 0 | A/A |
| control-699 | 1 | 60 | 0 | 0 | 1 | G/A |
| control-700 | 1 | 60 | 1 | 1 | 1 | A/A |
| control-701 | 2 | 50 | 0 | 0 | 0 | A/A |
| control-702 | 1 | 54 | 1 | 1 | 1 | G/A |
| control-703 | 1 | 58 | 0 | 0 | 1 | A/A |
| control-704 | 1 | 68 | 1 | 0 | 1 | A/A |
| control-705 | 1 | 57 | 0 | 0 | 0 | G/A |
| control-706 | 2 | 71 | 0 | 0 | 0 | A/A |
| control-707 | 1 | 62 | 0 | 0 | 1 | G/A |
| control-708 | 1 | 66 | 0 | 0 | 0 | A/A |
| control-709 | 1 | 65 | 1 | 0 | 1 | A/A |
| control-710 | 1 | 61 | 0 | 0 | 1 | G/A |
| control-711 | 2 | 61 | 0 | 0 | 0 | A/A |
| control-712 | 2 | 57 | 0 | 0 | 0 | G/A |
| control-713 | 1 | 56 | 1 | 1 | 1 | A/A |
| control-714 | 2 | 71 | 0 | 0 | 1 | A/A |
| control-715 | 2 | 59 | 0 | 0 | 1 | A/A |
| control-716 | 2 | 61 | 0 | 0 | 1 | A/A |
| control-717 | 2 | 54 | 0 | 1 | 0 | A/A |
| control-718 | 1 | 65 | 0 | 0 | 1 | A/A |
| control-719 | 1 | 64 | 1 | 0 | 0 | G/A |
| control-720 | 2 | 66 | 0 | 0 | 1 | A/A |
| control-721 | 1 | 56 | 1 | 1 | 0 | A/A |
| control-722 | 1 | 51 | 1 | 0 | 1 | A/A |
| control-723 | 1 | 54 | 0 | 0 | 1 | G/A |
| control-724 | 1 | 75 | 1 | 0 | 1 | G/A |
| control-725 | 1 | 59 | 1 | 1 | 0 | G/A |



|             |   |    |   |   |   |     |
|-------------|---|----|---|---|---|-----|
| control-726 | 1 | 57 | 1 | 0 | 1 | A/A |
| control-727 | 1 | 66 | 0 | 1 | 1 | G/A |
| control-728 | 1 | 73 | 0 | 0 | 1 | A/A |
| control-729 | 1 | 63 | 0 | 1 | 0 | G/A |
| control-730 | 2 | 77 | 0 | 0 | 0 | G/A |
| control-731 | 1 | 52 | 1 | 1 | 0 | A/A |
| control-732 | 2 | 65 | 0 | 0 | 0 | A/A |
| control-733 | 1 | 59 | 1 | 0 | 0 | A/A |
| control-734 | 1 | 67 | 0 | 0 | 0 | G/G |
| control-735 | 1 | 64 | 0 | 1 | 1 | A/A |
| control-736 | 1 | 57 | 1 | 0 | 1 | A/A |
| control-737 | 1 | 52 | 0 | 0 | 1 | A/A |
| control-738 | 1 | 73 | 0 | 0 | 0 | A/A |
| control-739 | 1 | 51 | 0 | 0 | 1 | A/A |
| control-740 | 1 | 68 | 1 | 1 | 1 | G/A |
| control-741 | 1 | 63 | 0 | 0 | 0 | A/A |
| control-742 | 2 | 70 | 0 | 0 | 0 | A/A |
| control-743 | 1 | 63 | 1 | 0 | 1 | G/A |
| control-744 | 2 | 68 | 0 | 0 | 1 | A/A |
| control-745 | 2 | 55 | 0 | 0 | 1 | A/A |
| control-746 | 1 | 55 | 1 | 1 | 1 | A/A |
| control-747 | 1 | 68 | 1 | 1 | 0 | G/A |
| control-748 | 1 | 64 | 1 | 1 | 0 | G/A |
| control-749 | 1 | 60 | 0 | 0 | 0 | G/A |
| control-750 | 1 | 73 | 1 | 1 | 1 | A/A |
| control-751 | 1 | 50 | 0 | 0 | 0 | A/A |
| control-752 | 1 | 51 | 0 | 1 | 1 | G/A |
| control-753 | 1 | 77 | 0 | 0 | 1 | A/A |
| control-754 | 1 | 58 | 1 | 1 | 0 | A/A |
| control-755 | 1 | 57 | 0 | 0 | 0 | G/G |
| control-756 | 1 | 61 | 1 | 1 | 1 | G/A |
| control-757 | 1 | 63 | 1 | 0 | 0 | G/A |
| control-758 | 2 | 70 | 0 | 0 | 1 | A/A |
| control-759 | 1 | 70 | 1 | 0 | 1 | A/A |
| control-760 | 1 | 60 | 1 | 0 | 0 | A/A |
| control-761 | 1 | 79 | 0 | 0 | 0 | A/A |
| control-762 | 2 | 66 | 0 | 0 | 1 | A/A |
| control-763 | 1 | 70 | 1 | 1 | 1 | A/A |
| control-764 | 1 | 65 | 1 | 0 | 0 | G/A |
| control-765 | 2 | 63 | 0 | 0 | 0 | G/A |
| control-766 | 2 | 59 | 0 | 0 | 1 | A/A |
| control-767 | 1 | 59 | 1 | 1 | 0 | G/A |
| control-768 | 1 | 61 | 1 | 1 | 0 | A/A |
| control-769 | 1 | 50 | 0 | 1 | 1 | G/A |
| control-770 | 1 | 71 | 1 | 0 | 0 | A/A |
| control-771 | 2 | 50 | 0 | 0 | 1 | A/A |
| control-772 | 1 | 65 | 0 | 0 | 1 | A/A |
| control-773 | 1 | 69 | 0 | 0 | 1 | A/A |
| control-774 | 2 | 73 | 0 | 0 | 1 | A/A |
| control-775 | 1 | 68 | 0 | 0 | 0 | A/A |
| control-776 | 2 | 56 | 0 | 0 | 0 | G/A |
| control-777 | 1 | 78 | 1 | 1 | 0 | A/A |
| control-778 | 1 | 65 | 1 | 1 | 0 | G/A |
| control-779 | 1 | 74 | 0 | 0 | 1 | A/A |
| control-780 | 1 | 75 | 1 | 0 | 1 | A/A |
| control-781 | 1 | 55 | 0 | 0 | 0 | G/A |
| control-782 | 2 | 68 | 0 | 0 | 1 | A/A |
| control-783 | 2 | 59 | 0 | 0 | 1 | G/G |

|             |   |    |   |   |   |     |
|-------------|---|----|---|---|---|-----|
| control-784 | 1 | 59 | 0 | 0 | 0 | A/A |
| control-785 | 1 | 59 | 1 | 0 | 0 | A/A |
| control-786 | 1 | 56 | 0 | 0 | 1 | A/A |
| control-787 | 2 | 63 | 0 | 0 | 1 | A/A |
| control-788 | 1 | 70 | 1 | 1 | 0 | G/A |
| control-789 | 2 | 71 | 0 | 0 | 1 | A/A |
| control-790 | 1 | 52 | 1 | 0 | 1 | A/A |
| control-791 | 2 | 68 | 0 | 0 | 1 | A/A |
| control-792 | 2 | 53 | 0 | 0 | 1 | A/A |
| control-793 | 1 | 61 | 1 | 1 | 0 | A/A |
| control-794 | 1 | 74 | 0 | 0 | 1 | A/A |
| control-795 | 2 | 72 | 0 | 0 | 1 | A/A |
| control-796 | 1 | 74 | 0 | 0 | 0 | A/A |
| control-797 | 2 | 68 | 0 | 0 | 0 | G/A |
| control-798 | 1 | 76 | 0 | 0 | 1 | A/A |
| control-799 | 1 | 61 | 0 | 0 | 0 | G/A |
| control-800 | 1 | 61 | 0 | 1 | 1 | A/A |
| control-801 | 1 | 74 | 1 | 0 | 1 | A/A |
| control-802 | 1 | 71 | 1 | 0 | 1 | A/A |
| control-803 | 1 | 56 | 0 | 0 | 0 | A/A |
| control-804 | 1 | 64 | 1 | 1 | 0 | A/A |
| control-805 | 2 | 53 | 0 | 0 | 1 | A/A |
| control-806 | 1 | 71 | 0 | 0 | 1 | A/A |
| control-807 | 1 | 52 | 0 | 0 | 1 | A/A |
| control-808 | 1 | 70 | 0 | 0 | 0 | A/A |
| control-809 | 1 | 52 | 1 | 0 | 1 | A/A |
| control-810 | 1 | 66 | 0 | 0 | 0 | A/A |
| control-811 | 2 | 57 | 0 | 0 | 0 | A/A |
| control-812 | 1 | 56 | 1 | 1 | 0 | A/A |
| control-813 | 1 | 75 | 1 | 1 | 0 | ?   |
| control-814 | 2 | 62 | 0 | 0 | 0 | G/A |
| control-815 | 1 | 74 | 0 | 0 | 1 | A/A |
| control-816 | 2 | 70 | 0 | 0 | 0 | G/A |
| control-817 | 1 | 73 | 0 | 0 | 0 | A/A |
| control-818 | 2 | 61 | 0 | 0 | 0 | A/A |
| control-819 | 1 | 73 | 0 | 0 | 1 | G/A |
| control-820 | 2 | 57 | 0 | 0 | 0 | A/A |
| control-821 | 2 | 63 | 0 | 0 | 1 | A/A |
| control-822 | 2 | 58 | 0 | 0 | 1 | G/A |
| control-823 | 1 | 66 | 0 | 0 | 0 | A/A |
| control-824 | 1 | 67 | 1 | 0 | 1 | A/A |
| control-825 | 1 | 65 | 1 | 1 | 1 | G/A |
| control-826 | 1 | 50 | 0 | 0 | 0 | A/A |
| control-827 | 2 | 55 | 0 | 0 | 1 | A/A |
| control-828 | 1 | 74 | 0 | 0 | 1 | A/A |
| control-829 | 1 | 56 | 0 | 0 | 1 | A/A |
| control-830 | 2 | 59 | 0 | 0 | 0 | A/A |
| control-831 | 1 | 65 | 1 | 1 | 0 | G/G |
| control-832 | 2 | 72 | 0 | 0 | 0 | G/A |
| control-833 | 2 | 47 | 0 | 0 | 1 | G/A |
| control-834 | 1 | 58 | 1 | 1 | 0 | A/A |
| control-835 | 1 | 60 | 1 | 1 | 0 | A/A |
| control-836 | 1 | 69 | 0 | 0 | 1 | A/A |
| control-837 | 2 | 62 | 0 | 0 | 0 | G/A |
| control-838 | 1 | 74 | 1 | 1 | 1 | A/A |
| control-839 | 2 | 61 | 0 | 0 | 1 | A/A |
| control-840 | 2 | 69 | 0 | 0 | 1 | A/A |
| control-841 | 1 | 78 | 0 | 0 | 0 | G/A |

|             |   |    |   |   |   |     |
|-------------|---|----|---|---|---|-----|
| control-842 | 1 | 70 | 1 | 0 | 1 | A/A |
| control-843 | 2 | 53 | 0 | 0 | 0 | A/A |
| control-844 | 1 | 58 | 0 | 0 | 1 | A/A |
| control-845 | 2 | 61 | 0 | 0 | 0 | A/A |
| control-846 | 1 | 68 | 0 | 0 | 0 | G/A |
| control-847 | 1 | 68 | 0 | 0 | 0 | A/A |
| control-848 | 1 | 69 | 0 | 0 | 1 | A/A |
| control-849 | 1 | 61 | 0 | 0 | 0 | A/A |
| control-850 | 2 | 53 | 0 | 0 | 0 | A/A |
| control-851 | 1 | 69 | 0 | 0 | 1 | A/A |
| control-852 | 2 | 45 | 0 | 0 | 1 | A/A |
| control-853 | 1 | 55 | 1 | 1 | 0 | A/A |
| control-854 | 2 | 52 | 0 | 0 | 1 | G/A |
| control-855 | 1 | 67 | 0 | 0 | 1 | A/A |
| control-856 | 1 | 53 | 1 | 0 | 1 | G/A |
| control-857 | 2 | 59 | 0 | 0 | 1 | A/A |
| control-858 | 1 | 49 | 1 | 1 | 0 | A/A |
| control-859 | 2 | 59 | 0 | 0 | 1 | G/A |
| control-860 | 1 | 55 | 1 | 0 | 1 | G/G |
| control-861 | 1 | 62 | 0 | 0 | 1 | A/A |
| control-862 | 2 | 63 | 0 | 0 | 1 | A/A |
| control-863 | 1 | 57 | 0 | 1 | 0 | A/A |
| control-864 | 1 | 53 | 0 | 0 | 0 | A/A |
| control-865 | 2 | 68 | 0 | 0 | 0 | A/A |
| control-866 | 1 | 76 | 0 | 0 | 0 | A/A |
| control-867 | 2 | 79 | 0 | 0 | 0 | A/A |
| control-868 | 1 | 45 | 0 | 0 | 1 | A/A |
| control-869 | 1 | 72 | 0 | 0 | 0 | G/A |
| control-870 | 1 | 67 | 1 | 1 | 0 | A/A |
| control-871 | 1 | 52 | 0 | 0 | 1 | G/A |
| control-872 | 2 | 47 | 0 | 0 | 0 | A/A |
| control-873 | 1 | 53 | 0 | 0 | 1 | G/A |
| control-874 | 2 | 56 | 0 | 0 | 0 | G/A |
| control-875 | 1 | 70 | 1 | 0 | 1 | G/A |
| control-876 | 1 | 70 | 0 | 0 | 1 | A/A |
| control-877 | 2 | 53 | 0 | 0 | 0 | A/A |
| control-878 | 1 | 52 | 0 | 1 | 0 | A/A |
| control-879 | 1 | 63 | 0 | 0 | 0 | A/A |
| control-880 | 2 | 67 | 0 | 0 | 1 | G/A |
| control-881 | 2 | 48 | 0 | 0 | 1 | A/A |
| control-882 | 1 | 61 | 0 | 1 | 0 | A/A |
| control-883 | 2 | 71 | 0 | 0 | 0 | A/A |
| control-884 | 1 | 44 | 0 | 0 | 1 | A/A |
| control-885 | 1 | 69 | 1 | 0 | 0 | A/A |
| control-886 | 1 | 59 | 0 | 0 | 0 | A/A |
| control-887 | 1 | 70 | 1 | 0 | 0 | A/A |
| control-888 | 1 | 68 | 0 | 0 | 0 | G/G |
| control-889 | 1 | 52 | 0 | 0 | 1 | A/A |
| control-890 | 2 | 65 | 0 | 0 | 1 | A/A |
| control-891 | 2 | 48 | 0 | 0 | 0 | A/A |
| control-892 | 2 | 59 | 0 | 0 | 0 | G/A |
| control-893 | 1 | 69 | 1 | 1 | 0 | A/A |
| control-894 | 1 | 50 | 0 | 0 | 0 | A/A |
| control-895 | 1 | 70 | 0 | 0 | 0 | A/A |
| control-896 | 2 | 53 | 0 | 0 | 1 | A/A |
| control-897 | 1 | 70 | 1 | 1 | 0 | A/A |
| control-898 | 1 | 71 | 1 | 0 | 0 | A/A |
| control-899 | 1 | 54 | 0 | 0 | 1 | A/A |

|             |   |    |   |   |   |     |
|-------------|---|----|---|---|---|-----|
| control-900 | 1 | 56 | 0 | 0 | 1 | A/A |
| control-901 | 2 | 58 | 0 | 0 | 1 | A/A |
| control-902 | 1 | 79 | 0 | 0 | 1 | A/A |
| control-903 | 2 | 72 | 0 | 0 | 0 | A/A |
| control-904 | 1 | 60 | 0 | 0 | 0 | A/A |
| control-905 | 2 | 73 | 0 | 0 | 1 | A/A |
| control-906 | 1 | 60 | 1 | 0 | 0 | A/A |
| control-907 | 2 | 57 | 0 | 0 | 1 | A/A |
| control-908 | 1 | 55 | 0 | 0 | 0 | A/A |
| control-909 | 2 | 68 | 0 | 0 | 0 | G/A |
| control-910 | 2 | 61 | 0 | 0 | 1 | A/A |
| control-911 | 1 | 45 | 1 | 1 | 0 | G/A |
| control-912 | 2 | 64 | 0 | 0 | 0 | A/A |
| control-913 | 1 | 76 | 0 | 0 | 1 | A/A |
| control-914 | 2 | 66 | 0 | 0 | 0 | G/A |
| control-915 | 2 | 67 | 0 | 0 | 0 | A/A |
| control-916 | 2 | 51 | 0 | 0 | 1 | A/A |
| control-917 | 1 | 69 | 0 | 0 | 0 | A/A |
| control-918 | 2 | 67 | 0 | 0 | 1 | A/A |
| control-919 | 1 | 73 | 1 | 0 | 0 | A/A |
| control-920 | 1 | 75 | 0 | 0 | 1 | G/A |
| control-921 | 1 | 51 | 1 | 0 | 0 | A/A |
| control-922 | 1 | 65 | 1 | 0 | 0 | A/A |
| control-923 | 2 | 61 | 0 | 0 | 1 | G/A |
| control-924 | 2 | 65 | 0 | 0 | 0 | A/A |
| control-925 | 2 | 70 | 0 | 0 | 1 | G/A |
| control-926 | 1 | 65 | 0 | 0 | 1 | G/A |
| control-927 | 1 | 60 | 1 | 0 | 1 | A/A |
| control-928 | 1 | 58 | 1 | 1 | 1 | G/A |
| control-929 | 2 | 71 | 0 | 0 | 0 | A/A |
| control-930 | 2 | 67 | 0 | 0 | 0 | A/A |
| control-931 | 2 | 66 | 0 | 0 | 1 | A/A |
| control-932 | 1 | 68 | 0 | 0 | 1 | A/A |
| control-933 | 1 | 43 | 0 | 0 | 1 | A/A |
| control-934 | 1 | 70 | 0 | 0 | 0 | A/A |
| control-935 | 2 | 47 | 0 | 0 | 1 | A/A |
| control-936 | 2 | 52 | 0 | 0 | 1 | G/A |
| control-937 | 1 | 52 | 0 | 0 | 1 | A/A |
| control-938 | 2 | 61 | 0 | 0 | 0 | A/A |
| control-939 | 2 | 66 | 0 | 0 | 0 | A/A |
| control-940 | 2 | 59 | 0 | 0 | 0 | A/A |
| control-941 | 1 | 63 | 1 | 0 | 1 | G/A |
| control-942 | 1 | 59 | 1 | 1 | 0 | A/A |
| control-943 | 1 | 72 | 1 | 0 | 1 | A/A |
| control-944 | 1 | 70 | 1 | 0 | 0 | G/A |
| control-945 | 2 | 56 | 0 | 0 | 1 | A/A |
| control-946 | 2 | 69 | 0 | 0 | 1 | A/A |
| control-947 | 1 | 58 | 1 | 1 | 1 | A/A |
| control-948 | 1 | 49 | 1 | 1 | 1 | G/A |
| control-949 | 2 | 60 | 0 | 0 | 1 | A/A |
| control-950 | 1 | 51 | 1 | 1 | 0 | A/A |
| control-951 | 2 | 51 | 0 | 0 | 1 | A/A |
| control-952 | 1 | 75 | 0 | 0 | 0 | G/A |
| control-953 | 1 | 46 | 1 | 0 | 1 | A/A |
| control-954 | 1 | 64 | 1 | 0 | 0 | A/A |
| control-955 | 1 | 72 | 1 | 1 | 0 | A/A |
| control-956 | 1 | 75 | 0 | 0 | 0 | G/G |
| control-957 | 1 | 56 | 1 | 1 | 1 | A/A |

|              |   |    |   |   |   |     |
|--------------|---|----|---|---|---|-----|
| control-958  | 2 | 46 | 0 | 0 | 0 | A/A |
| control-959  | 2 | 56 | 0 | 0 | 0 | A/A |
| control-960  | 2 | 72 | 0 | 0 | 1 | A/A |
| control-961  | 1 | 79 | 0 | 0 | 1 | A/A |
| control-962  | 1 | 53 | 0 | 0 | 1 | A/A |
| control-963  | 1 | 68 | 1 | 1 | 0 | A/A |
| control-964  | 1 | 69 | 1 | 1 | 0 | A/A |
| control-965  | 1 | 70 | 1 | 0 | 1 | A/A |
| control-966  | 1 | 75 | 1 | 0 | 1 | G/A |
| control-967  | 2 | 66 | 0 | 0 | 1 | A/A |
| control-968  | 1 | 67 | 0 | 0 | 0 | A/A |
| control-969  | 1 | 67 | 0 | 0 | 1 | A/A |
| control-970  | 2 | 54 | 0 | 0 | 1 | A/A |
| control-971  | 1 | 53 | 0 | 0 | 0 | A/A |
| control-972  | 1 | 65 | 1 | 0 | 1 | A/A |
| control-973  | 2 | 60 | 0 | 0 | 0 | G/A |
| control-974  | 2 | 48 | 0 | 0 | 0 | A/A |
| control-975  | 1 | 52 | 0 | 0 | 0 | A/A |
| control-976  | 2 | 62 | 0 | 0 | 0 | A/A |
| control-977  | 2 | 61 | 0 | 0 | 0 | G/A |
| control-978  | 1 | 56 | 0 | 0 | 1 | A/A |
| control-979  | 1 | 57 | 0 | 0 | 1 | G/A |
| control-980  | 1 | 61 | 1 | 1 | 0 | A/A |
| control-981  | 2 | 65 | 0 | 0 | 0 | A/A |
| control-982  | 1 | 69 | 0 | 0 | 0 | A/A |
| control-983  | 1 | 75 | 1 | 1 | 0 | A/A |
| control-984  | 2 | 68 | 0 | 0 | 0 | A/A |
| control-985  | 1 | 60 | 1 | 0 | 0 | A/A |
| control-986  | 1 | 65 | 0 | 0 | 1 | G/A |
| control-987  | 2 | 56 | 0 | 0 | 0 | A/A |
| control-988  | 1 | 50 | 0 | 1 | 0 | A/A |
| control-989  | 1 | 49 | 0 | 0 | 0 | A/A |
| control-990  | 2 | 47 | 0 | 0 | 1 | A/A |
| control-991  | 2 | 71 | 0 | 0 | 1 | G/A |
| control-992  | 1 | 71 | 0 | 0 | 1 | A/A |
| control-993  | 1 | 69 | 0 | 0 | 0 | A/A |
| control-994  | 1 | 74 | 0 | 0 | 0 | A/A |
| control-995  | 2 | 64 | 0 | 0 | 0 | A/A |
| control-996  | 2 | 72 | 0 | 0 | 0 | A/A |
| control-997  | 1 | 70 | 1 | 0 | 1 | A/A |
| control-998  | 1 | 71 | 1 | 1 | 1 | A/A |
| control-999  | 2 | 61 | 0 | 0 | 1 | G/A |
| control-1000 | 2 | 60 | 0 | 0 | 0 | A/A |
| control-1001 | 2 | 66 | 0 | 0 | 1 | A/A |
| control-1002 | 1 | 72 | 1 | 0 | 1 | A/A |
| control-1003 | 1 | 69 | 1 | 0 | 0 | G/A |
| control-1004 | 2 | 75 | 0 | 0 | 1 | A/A |
| control-1005 | 2 | 43 | 0 | 0 | 1 | G/A |
| control-1006 | 1 | 75 | 1 | 1 | 0 | A/A |
| control-1007 | 2 | 66 | 0 | 0 | 1 | G/A |
| control-1008 | 1 | 58 | 0 | 0 | 0 | A/A |
| control-1009 | 1 | 67 | 0 | 0 | 1 | G/A |
| control-1010 | 1 | 58 | 0 | 1 | 1 | A/A |
| control-1011 | 1 | 62 | 0 | 0 | 1 | A/A |
| control-1012 | 1 | 67 | 0 | 0 | 0 | A/A |
| control-1013 | 1 | 67 | 1 | 1 | 0 | G/A |
| control-1014 | 1 | 73 | 1 | 0 | 0 | G/A |
| control-1015 | 2 | 66 | 0 | 0 | 1 | G/A |

|              |   |    |   |   |   |     |
|--------------|---|----|---|---|---|-----|
| control-1016 | 1 | 72 | 0 | 0 | 1 | A/A |
| control-1017 | 2 | 61 | 0 | 0 | 0 | A/A |
| control-1018 | 1 | 66 | 1 | 0 | 0 | A/A |
| control-1019 | 1 | 74 | 0 | 1 | 0 | A/A |
| control-1020 | 2 | 61 | 0 | 0 | 0 | G/A |
| control-1021 | 2 | 70 | 0 | 0 | 1 | A/A |
| control-1022 | 2 | 76 | 0 | 0 | 1 | A/A |
| control-1023 | 1 | 70 | 1 | 0 | 1 | A/A |
| control-1024 | 1 | 73 | 0 | 0 | 0 | A/A |
| control-1025 | 1 | 75 | 0 | 1 | 0 | G/A |
| control-1026 | 1 | 71 | 0 | 0 | 1 | A/A |
| control-1027 | 1 | 69 | 1 | 1 | 1 | A/A |
| control-1028 | 2 | 72 | 0 | 0 | 1 | A/A |
| control-1029 | 2 | 75 | 0 | 0 | 1 | A/A |
| control-1030 | 1 | 60 | 0 | 0 | 0 | A/A |
| control-1031 | 2 | 72 | 0 | 0 | 1 | A/A |
| control-1032 | 1 | 68 | 0 | 0 | 1 | A/A |
| control-1033 | 1 | 56 | 0 | 0 | 1 | G/A |
| control-1034 | 1 | 66 | 0 | 0 | 0 | A/A |
| control-1035 | 2 | 51 | 0 | 0 | 0 | A/A |
| control-1036 | 1 | 70 | 1 | 1 | 1 | A/A |
| control-1037 | 1 | 70 | 1 | 0 | 0 | A/A |
| control-1038 | 1 | 47 | 1 | 1 | 1 | A/A |
| control-1039 | 2 | 72 | 0 | 0 | 0 | A/A |
| control-1040 | 2 | 74 | 0 | 0 | 0 | G/A |
| control-1041 | 2 | 59 | 0 | 0 | 0 | A/A |
| control-1042 | 1 | 69 | 0 | 0 | 1 | A/A |
| control-1043 | 1 | 74 | 0 | 0 | 0 | A/A |
| control-1044 | 1 | 64 | 0 | 0 | 0 | A/A |
| control-1045 | 2 | 66 | 0 | 0 | 0 | A/A |
| control-1046 | 1 | 71 | 1 | 1 | 1 | A/A |
| control-1047 | 2 | 72 | 0 | 0 | 1 | A/A |
| control-1048 | 1 | 65 | 0 | 1 | 1 | A/A |
| control-1049 | 2 | 67 | 0 | 0 | 1 | A/A |
| control-1050 | 2 | 59 | 0 | 0 | 0 | G/A |
| control-1051 | 2 | 53 | 0 | 0 | 0 | A/A |
| control-1052 | 1 | 66 | 1 | 1 | 1 | G/A |
| control-1053 | 2 | 75 | 0 | 0 | 1 | A/A |
| control-1054 | 1 | 50 | 0 | 0 | 1 | A/A |
| control-1055 | 1 | 67 | 0 | 0 | 1 | G/A |
| control-1056 | 2 | 50 | 0 | 0 | 0 | G/A |
| control-1057 | 1 | 69 | 0 | 1 | 1 | A/A |
| control-1058 | 2 | 69 | 0 | 0 | 0 | A/A |
| control-1059 | 1 | 63 | 1 | 0 | 0 | A/A |
| control-1060 | 1 | 52 | 0 | 0 | 0 | G/A |
| control-1061 | 2 | 69 | 0 | 0 | 0 | A/A |
| control-1062 | 1 | 75 | 0 | 0 | 0 | G/A |
| control-1063 | 1 | 76 | 1 | 0 | 0 | A/A |
| control-1064 | 1 | 71 | 1 | 0 | 1 | A/A |
| control-1065 | 1 | 61 | 0 | 1 | 0 | A/A |
| control-1066 | 1 | 73 | 0 | 0 | 1 | A/A |
| control-1067 | 2 | 68 | 0 | 0 | 0 | A/A |
| control-1068 | 1 | 61 | 1 | 1 | 1 | G/A |
| control-1069 | 2 | 61 | 0 | 0 | 0 | G/A |
| control-1070 | 1 | 73 | 1 | 0 | 1 | A/A |
| control-1071 | 1 | 62 | 0 | 0 | 1 | A/A |
| control-1072 | 1 | 52 | 1 | 0 | 0 | A/A |
| control-1073 | 1 | 62 | 1 | 1 | 1 | G/A |

|              |   |    |   |   |   |     |
|--------------|---|----|---|---|---|-----|
| control-1074 | 2 | 53 | 0 | 0 | 1 | A/A |
| control-1075 | 1 | 74 | 0 | 0 | 0 | A/A |
| control-1076 | 1 | 58 | 1 | 1 | 0 | A/A |
| control-1077 | 2 | 74 | 0 | 0 | 1 | A/A |
| control-1078 | 2 | 67 | 0 | 0 | 1 | A/A |
| control-1079 | 2 | 83 | 0 | 0 | 0 | G/A |
| control-1080 | 1 | 76 | 0 | 0 | 1 | A/A |
| control-1081 | 1 | 44 | 1 | 0 | 0 | G/A |
| control-1082 | 2 | 73 | 0 | 0 | 0 | A/A |
| control-1083 | 1 | 49 | 0 | 0 | 0 | A/A |
| control-1084 | 1 | 70 | 1 | 0 | 1 | A/A |
| control-1085 | 2 | 64 | 0 | 0 | 0 | A/A |
| control-1086 | 1 | 73 | 1 | 1 | 1 | A/A |
| control-1087 | 1 | 73 | 0 | 1 | 1 | G/G |
| control-1088 | 2 | 61 | 0 | 0 | 1 | A/A |
| control-1089 | 1 | 65 | 1 | 1 | 1 | A/A |
| control-1090 | 1 | 76 | 0 | 0 | 0 | A/A |
| control-1091 | 1 | 69 | 1 | 0 | 1 | G/A |
| control-1092 | 1 | 76 | 0 | 0 | 0 | A/A |
| control-1093 | 2 | 68 | 0 | 0 | 1 | A/A |
| control-1094 | 1 | 70 | 1 | 1 | 0 | G/A |
| control-1095 | 1 | 64 | 1 | 1 | 1 | A/A |
| control-1096 | 2 | 62 | 0 | 0 | 1 | G/A |
| control-1097 | 1 | 64 | 0 | 0 | 1 | G/A |
| control-1098 | 1 | 50 | 0 | 1 | 0 | G/A |
| control-1099 | 1 | 46 | 0 | 0 | 1 | A/A |
| control-1100 | 1 | 51 | 1 | 1 | 1 | A/A |
| control-1101 | 1 | 59 | 0 | 0 | 0 | A/A |
| control-1102 | 1 | 71 | 0 | 0 | 0 | A/A |
| control-1103 | 1 | 74 | 0 | 0 | 1 | G/A |
| control-1104 | 1 | 70 | 0 | 0 | 1 | G/A |
| control-1105 | 1 | 69 | 0 | 0 | 1 | A/A |
| control-1106 | 1 | 68 | 1 | 0 | 1 | A/A |
| control-1107 | 1 | 58 | 0 | 1 | 1 | A/A |
| control-1108 | 1 | 72 | 1 | 0 | 1 | A/A |
| control-1109 | 1 | 66 | 1 | 0 | 1 | A/A |
| control-1110 | 1 | 70 | 0 | 0 | 0 | A/A |
| control-1111 | 2 | 48 | 0 | 0 | 0 | A/A |
| control-1112 | 1 | 76 | 1 | 1 | 0 | G/A |
| control-1113 | 1 | 61 | 0 | 0 | 1 | A/A |
| control-1114 | 1 | 67 | 0 | 0 | 1 | A/A |
| control-1115 | 1 | 75 | 0 | 0 | 1 | G/G |
| control-1116 | 1 | 61 | 0 | 1 | 1 | G/A |
| control-1117 | 1 | 74 | 0 | 1 | 1 | A/A |
| control-1118 | 1 | 74 | 0 | 0 | 0 | A/A |
| control-1119 | 1 | 61 | 1 | 0 | 1 | A/A |
| control-1120 | 1 | 62 | 0 | 1 | 0 | A/A |
| control-1121 | 1 | 72 | 1 | 1 | 1 | A/A |
| control-1122 | 1 | 60 | 1 | 0 | 1 | G/A |
| control-1123 | 1 | 72 | 0 | 0 | 1 | A/A |
| control-1124 | 1 | 73 | 1 | 0 | 0 | G/A |
| control-1125 | 1 | 83 | 0 | 0 | 0 | A/A |
| control-1126 | 1 | 73 | 0 | 1 | 1 | A/A |
| control-1127 | 2 | 41 | 0 | 0 | 0 | A/A |
| control-1128 | 1 | 71 | 0 | 0 | 1 | G/A |
| control-1129 | 1 | 58 | 1 | 0 | 1 | G/G |
| control-1130 | 1 | 61 | 1 | 1 | 0 | G/A |
| control-1131 | 2 | 49 | 0 | 0 | 0 | A/A |

|              |   |    |   |   |   |     |
|--------------|---|----|---|---|---|-----|
| control-1132 | 1 | 72 | 1 | 0 | 0 | A/A |
| control-1133 | 1 | 72 | 0 | 0 | 1 | A/A |
| control-1134 | 2 | 66 | 0 | 0 | 0 | A/A |
| control-1135 | 1 | 68 | 0 | 0 | 0 | A/A |
| control-1136 | 1 | 62 | 1 | 0 | 0 | A/A |
| control-1137 | 2 | 45 | 0 | 0 | 0 | G/A |
| control-1138 | 1 | 71 | 0 | 1 | 0 | G/A |
| control-1139 | 1 | 59 | 0 | 0 | 1 | G/A |
| control-1140 | 2 | 45 | 0 | 0 | 1 | A/A |
| control-1141 | 1 | 71 | 0 | 0 | 1 | G/A |
| control-1142 | 1 | 61 | 0 | 0 | 0 | G/G |
| control-1143 | 1 | 66 | 1 | 1 | 0 | A/A |
| control-1144 | 2 | 46 | 0 | 0 | 1 | A/A |
| control-1145 | 2 | 67 | 0 | 0 | 0 | G/A |
| control-1146 | 1 | 52 | 0 | 0 | 1 | A/A |
| control-1147 | 1 | 65 | 1 | 0 | 0 | A/A |
| control-1148 | 1 | 53 | 0 | 0 | 0 | A/A |
| control-1149 | 2 | 65 | 0 | 0 | 0 | A/A |
| control-1150 | 1 | 64 | 1 | 1 | 1 | G/A |
| control-1151 | 1 | 61 | 1 | 1 | 1 | A/A |
| control-1152 | 1 | 71 | 1 | 0 | 0 | G/A |
| control-1153 | 1 | 75 | 0 | 0 | 1 | A/A |
| control-1154 | 2 | 74 | 0 | 0 | 0 | A/A |
| control-1155 | 1 | 58 | 1 | 1 | 1 | A/A |
| control-1156 | 2 | 62 | 0 | 0 | 0 | A/A |
| control-1157 | 1 | 57 | 1 | 0 | 1 | A/A |
| control-1158 | 1 | 75 | 0 | 0 | 0 | A/A |
| control-1159 | 1 | 64 | 1 | 0 | 0 | A/A |
| control-1160 | 2 | 55 | 0 | 0 | 0 | A/A |
| control-1161 | 2 | 59 | 0 | 0 | 1 | A/A |
| control-1162 | 2 | 59 | 1 | 1 | 1 | A/A |
| control-1163 | 1 | 74 | 1 | 1 | 0 | G/A |
| control-1164 | 2 | 57 | 0 | 0 | 1 | G/A |
| control-1165 | 1 | 59 | 1 | 0 | 0 | G/A |
| control-1166 | 1 | 59 | 0 | 0 | 1 | A/A |
| control-1167 | 2 | 58 | 0 | 0 | 1 | A/A |
| control-1168 | 2 | 72 | 0 | 0 | 1 | A/A |
| control-1169 | 1 | 71 | 1 | 1 | 0 | A/A |
| control-1170 | 1 | 76 | 0 | 0 | 1 | A/A |
| control-1171 | 1 | 60 | 1 | 1 | 0 | A/A |
| control-1172 | 2 | 64 | 0 | 0 | 1 | A/A |
| control-1173 | 1 | 60 | 0 | 0 | 0 | A/A |
| control-1174 | 1 | 75 | 1 | 0 | 0 | A/A |
| control-1175 | 1 | 53 | 0 | 0 | 0 | A/A |
| control-1176 | 1 | 63 | 0 | 0 | 1 | G/A |
| control-1177 | 1 | 46 | 0 | 0 | 1 | A/A |
| control-1178 | 1 | 44 | 0 | 0 | 1 | A/A |
| control-1179 | 1 | 66 | 1 | 0 | 0 | A/A |
| control-1180 | 1 | 74 | 1 | 0 | 0 | G/G |
| control-1181 | 1 | 53 | 1 | 1 | 0 | G/A |
| control-1182 | 2 | 74 | 0 | 0 | 0 | A/A |
| control-1183 | 2 | 62 | 0 | 0 | 0 | G/A |
| control-1184 | 2 | 63 | 0 | 0 | 0 | A/A |
| control-1185 | 1 | 74 | 0 | 0 | 1 | G/A |
| control-1186 | 1 | 51 | 1 | 1 | 1 | A/A |
| control-1187 | 1 | 58 | 0 | 1 | 0 | G/A |
| control-1188 | 1 | 57 | 0 | 0 | 1 | G/A |
| control-1189 | 2 | 56 | 0 | 0 | 1 | A/A |



|              |   |           |   |   |   |     |
|--------------|---|-----------|---|---|---|-----|
| control-1190 | 1 | 67        | 0 | 0 | 1 | A/A |
| control-1191 | 1 | 67        | 1 | 1 | 1 | G/A |
| control-1192 | 1 | 57        | 0 | 0 | 0 | A/A |
| control-1193 | 1 | 54        | 0 | 0 | 1 | A/A |
| control-1194 | 1 | 52        | 0 | 0 | 0 | A/A |
| control-1195 | 2 | 52        | 0 | 0 | 0 | A/A |
| control-1196 | 1 | 53        | 0 | 0 | 0 | A/A |
| control-1197 | 1 | 59        | 0 | 0 | 0 | A/A |
| control-1198 | 1 | 61        | 0 | 0 | 0 | G/A |
| control-1199 | 2 | <b>66</b> | 0 | 0 | 0 | A/A |
| control-1200 | 2 | 71        | 0 | 0 | 0 | A/A |
| control-1201 | 1 | 63        | 0 | 0 | 0 | A/A |
| control-1202 | 1 | 57        | 0 | 0 | 1 | G/A |
| control-1203 | 1 | 67        | 0 | 0 | 0 | G/A |
| control-1204 | 1 | 65        | 0 | 0 | 1 | G/A |
| control-1205 | 1 | 56        | 0 | 0 | 1 | G/A |
| control-1206 | 1 | 67        | 0 | 0 | 0 | A/A |
| control-1207 | 1 | 71        | 1 | 1 | 0 | A/A |
| control-1208 | 1 | 65        | 0 | 0 | 0 | A/A |
| control-1209 | 1 | 55        | 0 | 0 | 0 | A/A |
| control-1210 | 1 | 68        | 0 | 0 | 1 | A/A |
| control-1211 | 2 | 53        | 0 | 0 | 0 | A/A |
| control-1212 | 2 | 65        | 0 | 0 | 0 | A/A |
| control-1213 | 2 | 72        | 0 | 0 | 0 | G/A |
| control-1214 | 1 | 65        | 1 | 0 | 1 | A/A |
| control-1215 | 1 | 65        | 1 | 0 | 0 | A/A |
| control-1216 | 2 | 68        | 0 | 0 | 1 | A/A |
| control-1217 | 1 | 62        | 0 | 0 | 1 | A/A |
| control-1218 | 1 | 52        | 0 | 0 | 1 | G/A |
| control-1219 | 1 | 70        | 1 | 1 | 0 | A/A |
| control-1220 | 1 | 59        | 0 | 0 | 1 | A/A |
| control-1221 | 1 | 71        | 0 | 0 | 1 | A/A |
| control-1222 | 1 | 64        | 0 | 0 | 0 | G/A |
| control-1223 | 1 | 56        | 0 | 0 | 1 | A/A |
| control-1224 | 1 | 58        | 0 | 0 | 0 | A/A |
| control-1225 | 2 | 49        | 0 | 0 | 1 | A/A |
| control-1226 | 1 | 52        | 0 | 0 | 1 | A/A |
| control-1227 | 2 | 56        | 0 | 0 | 0 | A/A |
| control-1228 | 1 | 72        | 0 | 0 | 0 | A/A |
| control-1229 | 1 | 48        | 0 | 0 | 0 | G/A |
| control-1230 | 1 | 64        | 1 | 1 | 0 | G/A |
| control-1231 | 2 | 53        | 0 | 0 | 0 | A/A |
| control-1232 | 1 | 49        | 0 | 0 | 0 | A/A |
| control-1233 | 1 | 61        | 1 | 0 | 0 | A/A |
| control-1234 | 2 | 54        | 0 | 0 | 0 | G/A |
| control-1235 | 1 | 57        | 1 | 0 | 0 | A/A |
| control-1236 | 1 | 58        | 1 | 0 | 1 | A/A |
| control-1237 | 2 | 68        | 0 | 0 | 0 | G/A |
| control-1238 | 2 | 49        | 0 | 0 | 1 | A/A |
| control-1239 | 2 | 61        | 0 | 0 | 0 | G/A |
| control-1240 | 2 | 59        | 0 | 0 | 0 | A/A |
| control-1241 | 2 | 57        | 0 | 0 | 0 | A/A |
| control-1242 | 2 | 71        | 0 | 0 | 1 | G/A |
| control-1243 | 1 | 55        | 0 | 0 | 1 | A/A |
| control-1244 | 1 | 61        | 1 | 1 | 0 | A/A |
| control-1245 | 1 | 53        | 0 | 0 | 1 | G/A |
| control-1246 | 1 | 59        | 1 | 0 | 1 | A/A |
| control-1247 | 2 | 61        | 0 | 0 | 0 | G/A |

|              |   |    |   |   |   |     |
|--------------|---|----|---|---|---|-----|
| control-1248 | 2 | 70 | 0 | 0 | 1 | A/A |
| control-1249 | 1 | 69 | 1 | 0 | 0 | A/A |
| control-1250 | 2 | 52 | 0 | 0 | 1 | A/A |
| control-1251 | 2 | 58 | 0 | 0 | 0 | G/A |
| control-1252 | 1 | 69 | 0 | 0 | 0 | A/A |
| control-1253 | 1 | 63 | 0 | 0 | 0 | G/A |
| control-1254 | 2 | 64 | 0 | 0 | 0 | A/A |
| control-1255 | 2 | 59 | 0 | 0 | 1 | A/A |
| control-1256 | 1 | 63 | 0 | 0 | 1 | A/A |
| control-1257 | 1 | 63 | 1 | 0 | 0 | A/A |
| control-1258 | 2 | 58 | 0 | 0 | 0 | A/A |
| control-1259 | 2 | 62 | 0 | 0 | 0 | G/A |
| control-1260 | 1 | 69 | 1 | 0 | 0 | A/A |
| control-1261 | 1 | 62 | 0 | 0 | 1 | G/A |
| control-1262 | 2 | 63 | 0 | 0 | 1 | G/A |
| control-1263 | 1 | 63 | 1 | 0 | 1 | A/A |
| control-1264 | 1 | 72 | 0 | 0 | 0 | A/A |
| control-1265 | 1 | 61 | 0 | 1 | 0 | G/A |
| control-1266 | 2 | 59 | 0 | 0 | 0 | G/A |
| control-1267 | 2 | 59 | 0 | 0 | 0 | G/G |
| control-1268 | 1 | 64 | 0 | 1 | 1 | A/A |
| control-1269 | 2 | 59 | 0 | 0 | 0 | A/A |
| control-1270 | 1 | 69 | 0 | 0 | 1 | A/A |
| control-1271 | 1 | 61 | 1 | 0 | 0 | A/A |
| control-1272 | 1 | 60 | 0 | 1 | 0 | A/A |
| control-1273 | 1 | 64 | 0 | 0 | 1 | G/A |
| control-1274 | 1 | 67 | 0 | 0 | 1 | G/A |
| control-1275 | 1 | 65 | 0 | 0 | 1 | A/A |
| control-1276 | 1 | 59 | 1 | 0 | 1 | A/A |
| control-1277 | 1 | 64 | 0 | 0 | 1 | A/A |
| control-1278 | 1 | 63 | 1 | 1 | 1 | A/A |
| control-1279 | 1 | 57 | 0 | 0 | 1 | A/A |
| control-1280 | 1 | 67 | 1 | 0 | 1 | A/A |
| control-1281 | 1 | 66 | 0 | 0 | 0 | A/A |
| control-1282 | 1 | 69 | 0 | 0 | 1 | A/A |
| control-1283 | 2 | 63 | 0 | 0 | 0 | A/A |
| control-1284 | 2 | 60 | 0 | 0 | 1 | A/A |
| control-1285 | 1 | 67 | 0 | 0 | 1 | A/A |
| control-1286 | 1 | 69 | 0 | 0 | 1 | A/A |
| control-1287 | 2 | 59 | 0 | 0 | 1 | G/A |
| control-1288 | 1 | 70 | 0 | 0 | 0 | A/A |
| control-1289 | 1 | 68 | 1 | 0 | 1 | A/A |
| control-1290 | 1 | 65 | 0 | 0 | 0 | A/A |
| control-1291 | 1 | 68 | 0 | 0 | 0 | A/A |
| control-1292 | 1 | 71 | 0 | 1 | 1 | A/A |
| control-1293 | 2 | 63 | 0 | 0 | 1 | A/A |
| control-1294 | 1 | 72 | 0 | 0 | 0 | A/A |
| control-1295 | 2 | 71 | 0 | 0 | 1 | A/A |
| control-1296 | 2 | 59 | 0 | 0 | 1 | A/A |
| control-1297 | 1 | 62 | 0 | 0 | 0 | A/A |
| control-1298 | 2 | 62 | 0 | 0 | 0 | G/A |
| control-1299 | 1 | 65 | 1 | 0 | 0 | G/A |
| control-1300 | 1 | 70 | 1 | 1 | 0 | A/A |
| control-1301 | 1 | 71 | 0 | 0 | 0 | A/A |
| control-1302 | 1 | 72 | 0 | 0 | 1 | G/A |
| control-1303 | 1 | 63 | 1 | 1 | 0 | A/A |
| control-1304 | 2 | 56 | 0 | 0 | 0 | G/A |
| control-1305 | 1 | 71 | 1 | 0 | 0 | G/A |

|              |   |    |   |   |   |     |
|--------------|---|----|---|---|---|-----|
| control-1306 | 1 | 60 | 0 | 0 | 0 | G/G |
| control-1307 | 1 | 54 | 0 | 0 | 0 | A/A |
| control-1308 | 1 | 58 | 0 | 0 | 1 | G/G |
| control-1309 | 1 | 51 | 0 | 0 | 1 | A/A |
| control-1310 | 1 | 55 | 0 | 0 | 0 | A/A |
| control-1311 | 1 | 71 | 1 | 0 | 0 | G/G |
| control-1312 | 1 | 59 | 0 | 0 | 1 | A/A |
| control-1313 | 1 | 54 | 0 | 0 | 1 | ?   |
| control-1314 | 2 | 55 | 0 | 0 | 1 | A/A |
| control-1315 | 1 | 59 | 0 | 0 | 0 | A/A |
| control-1316 | 1 | 54 | 0 | 0 | 0 | A/A |
| control-1317 | 1 | 69 | 1 | 1 | 0 | A/A |
| control-1318 | 2 | 62 | 0 | 0 | 0 | G/G |
| control-1319 | 2 | 62 | 0 | 0 | 1 | A/A |
| control-1320 | 1 | 54 | 0 | 0 | 0 | A/A |
| control-1321 | 1 | 57 | 0 | 0 | 0 | A/A |
| control-1322 | 1 | 52 | 0 | 0 | 0 | ?   |
| control-1323 | 1 | 54 | 0 | 0 | 1 | G/G |
| control-1324 | 1 | 56 | 0 | 0 | 1 | A/A |
| control-1325 | 1 | 52 | 0 | 0 | 0 | A/A |
| control-1326 | 1 | 50 | 0 | 0 | 0 | A/A |
| control-1327 | 1 | 62 | 0 | 0 | 0 | A/A |
| control-1328 | 1 | 40 | 0 | 0 | 1 | A/A |
| control-1329 | 1 | 49 | 0 | 0 | 1 | A/A |
| control-1330 | 1 | 53 | 0 | 0 | 1 | G/G |
| control-1331 | 1 | 45 | 0 | 0 | 0 | G/G |
| control-1332 | 1 | 48 | 0 | 0 | 0 | A/A |
| control-1333 | 1 | 43 | 0 | 0 | 0 | G/G |
| control-1334 | 1 | 61 | 0 | 0 | 1 | A/A |
| control-1335 | 1 | 51 | 0 | 0 | 1 | G/G |
| control-1336 | 1 | 69 | 0 | 0 | 1 | A/A |
| control-1337 | 2 | 72 | 0 | 0 | 1 | G/A |
| control-1338 | 1 | 55 | 0 | 0 | 1 | A/A |
| control-1339 | 2 | 50 | 0 | 0 | 1 | G/A |
| control-1340 | 2 | 56 | 0 | 0 | 1 | A/A |
| control-1341 | 1 | 53 | 1 | 1 | 0 | A/A |
| control-1342 | 2 | 55 | 0 | 0 | 0 | A/A |
| control-1343 | 1 | 62 | 0 | 0 | 1 | A/A |
| control-1344 | 2 | 64 | 0 | 0 | 1 | A/A |
| control-1345 | 1 | 49 | 0 | 0 | 1 | A/A |
| control-1346 | 1 | 63 | 0 | 0 | 0 | A/A |
| control-1347 | 2 | 61 | 0 | 0 | 1 | A/A |
| control-1348 | 1 | 51 | 0 | 0 | 1 | A/A |
| control-1349 | 1 | 47 | 0 | 0 | 0 | A/A |
| control-1350 | 1 | 49 | 0 | 0 | 0 | G/A |
| control-1351 | 2 | 62 | 0 | 0 | 1 | A/A |
| control-1352 | 1 | 40 | 0 | 0 | 0 | A/A |
| control-1353 | 1 | 59 | 0 | 0 | 0 | G/A |
| control-1354 | 1 | 49 | 0 | 0 | 0 | G/A |
| control-1355 | 1 | 63 | 0 | 0 | 0 | G/A |
| control-1356 | 1 | 49 | 0 | 0 | 1 | G/A |
| control-1357 | 1 | 66 | 0 | 0 | 0 | G/A |
| control-1358 | 1 | 42 | 1 | 1 | 0 | A/A |
| control-1359 | 1 | 41 | 0 | 0 | 0 | A/A |
| control-1360 | 2 | 56 | 0 | 0 | 1 | G/A |
| control-1361 | 1 | 60 | 1 | 1 | 0 | G/A |
| control-1362 | 1 | 65 | 1 | 0 | 0 | A/A |
| control-1363 | 1 | 55 | 0 | 0 | 0 | A/A |

|              |   |    |   |   |   |     |
|--------------|---|----|---|---|---|-----|
| control-1364 | 1 | 63 | 1 | 1 | 0 | A/A |
| control-1365 | 2 | 40 | 0 | 0 | 0 | A/A |
| control-1366 | 1 | 50 | 0 | 1 | 0 | A/A |
| control-1367 | 1 | 50 | 1 | 0 | 0 | A/A |
| control-1368 | 1 | 52 | 0 | 0 | 1 | A/A |
| control-1369 | 1 | 40 | 0 | 0 | 1 | G/G |
| control-1370 | 1 | 52 | 1 | 0 | 0 | G/A |
| control-1371 | 1 | 55 | 1 | 0 | 1 | A/A |
| control-1372 | 1 | 56 | 1 | 0 | 1 | A/A |
| control-1373 | 1 | 49 | 0 | 0 | 1 | A/A |
| control-1374 | 2 | 53 | 0 | 0 | 1 | G/A |
| control-1375 | 1 | 51 | 1 | 0 | 1 | G/A |
| control-1376 | 1 | 53 | 1 | 0 | 1 | A/A |
| control-1377 | 1 | 52 | 1 | 0 | 0 | A/A |
| control-1378 | 1 | 54 | 0 | 0 | 1 | A/A |
| control-1379 | 1 | 53 | 1 | 1 | 0 | A/A |
| control-1380 | 2 | 55 | 0 | 0 | 0 | A/A |
| control-1381 | 1 | 56 | 1 | 0 | 0 | A/A |
| control-1382 | 1 | 53 | 1 | 0 | 1 | G/A |
| control-1383 | 1 | 51 | 1 | 0 | 0 | G/A |
| control-1384 | 1 | 47 | 1 | 0 | 1 | A/A |
| control-1385 | 1 | 56 | 1 | 0 | 1 | G/A |
| control-1386 | 1 | 43 | 1 | 0 | 1 | A/A |
| control-1387 | 1 | 50 | 0 | 0 | 1 | A/A |
| control-1388 | 1 | 47 | 0 | 0 | 0 | G/A |
| control-1389 | 1 | 50 | 1 | 1 | 0 | A/A |
| control-1390 | 1 | 49 | 0 | 0 | 1 | G/A |
| control-1391 | 2 | 56 | 0 | 0 | 0 | A/A |
| control-1392 | 1 | 56 | 1 | 0 | 0 | G/A |
| control-1393 | 1 | 47 | 1 | 0 | 1 | A/A |
| control-1394 | 1 | 52 | 0 | 0 | 0 | G/A |
| control-1395 | 1 | 55 | 0 | 0 | 1 | A/A |
| control-1396 | 1 | 53 | 0 | 0 | 1 | A/A |
| control-1397 | 1 | 56 | 1 | 0 | 1 | A/A |
| control-1398 | 1 | 52 | 1 | 0 | 1 | G/A |
| control-1399 | 1 | 54 | 0 | 0 | 1 | A/A |
| control-1400 | 1 | 47 | 1 | 0 | 1 | A/A |
| control-1401 | 1 | 53 | 0 | 0 | 1 | G/A |
| control-1402 | 1 | 42 | 1 | 0 | 1 | A/A |
| control-1403 | 1 | 44 | 1 | 0 | 0 | G/A |
| control-1404 | 1 | 52 | 1 | 1 | 1 | G/A |
| control-1405 | 1 | 55 | 0 | 1 | 1 | A/A |
| control-1406 | 2 | 51 | 0 | 0 | 1 | A/A |
| control-1407 | 1 | 49 | 0 | 0 | 1 | A/A |
| control-1408 | 1 | 46 | 0 | 0 | 1 | A/A |
| control-1409 | 2 | 52 | 0 | 0 | 0 | G/A |
| control-1410 | 2 | 56 | 0 | 0 | 0 | A/A |
| control-1411 | 1 | 54 | 1 | 0 | 0 | A/A |
| control-1412 | 1 | 51 | 1 | 0 | 0 | A/A |
| control-1413 | 1 | 47 | 0 | 0 | 1 | A/A |
| control-1414 | 1 | 52 | 1 | 0 | 1 | A/A |
| control-1415 | 1 | 53 | 0 | 0 | 1 | G/A |
| control-1416 | 1 | 50 | 1 | 0 | 0 | G/A |
| control-1417 | 1 | 56 | 1 | 1 | 0 | A/A |
| control-1418 | 1 | 51 | 1 | 0 | 0 | A/A |
| control-1419 | 1 | 45 | 1 | 0 | 1 | A/A |
| control-1420 | 1 | 47 | 0 | 0 | 0 | A/A |
| control-1421 | 1 | 53 | 1 | 0 | 0 | G/A |

|              |   |    |   |   |   |     |
|--------------|---|----|---|---|---|-----|
| control-1422 | 1 | 50 | 1 | 0 | 1 | A/A |
| control-1423 | 1 | 56 | 1 | 0 | 0 | A/A |
| control-1424 | 1 | 49 | 0 | 0 | 1 | A/A |
| control-1425 | 2 | 53 | 0 | 0 | 1 | A/A |
| control-1426 | 1 | 55 | 0 | 0 | 0 | A/A |
| control-1427 | 1 | 49 | 1 | 0 | 0 | A/A |
| control-1428 | 2 | 56 | 0 | 0 | 0 | A/A |
| control-1429 | 1 | 55 | 1 | 0 | 0 | A/A |
| control-1430 | 1 | 49 | 1 | 0 | 1 | G/A |
| control-1431 | 1 | 56 | 1 | 0 | 0 | G/A |
| control-1432 | 1 | 51 | 1 | 0 | 1 | A/A |
| control-1433 | 1 | 53 | 1 | 0 | 0 | A/A |
| control-1434 | 1 | 41 | 0 | 0 | 1 | A/A |
| control-1435 | 1 | 37 | 1 | 0 | 0 | G/A |
| control-1436 | 1 | 53 | 1 | 0 | 1 | A/A |
| control-1437 | 1 | 51 | 1 | 0 | 1 | G/A |
| control-1438 | 1 | 56 | 1 | 0 | 0 | ?   |
| control-1439 | 2 | 32 | 0 | 0 | 0 | G/A |
| control-1440 | 1 | 40 | 1 | 0 | 1 | G/A |
| control-1441 | 1 | 54 | 1 | 0 | 1 | A/A |
| control-1442 | 1 | 55 | 0 | 0 | 1 | A/A |
| control-1443 | 1 | 45 | 1 | 0 | 0 | A/A |
| control-1444 | 1 | 41 | 1 | 0 | 1 | G/A |
| control-1445 | 1 | 54 | 1 | 0 | 1 | G/A |
| control-1446 | 1 | 46 | 1 | 0 | 1 | A/A |
| control-1447 | 2 | 50 | 0 | 0 | 1 | A/A |
| control-1448 | 1 | 42 | 1 | 0 | 1 | A/A |
| control-1449 | 1 | 55 | 1 | 0 | 0 | A/A |
| control-1450 | 1 | 56 | 1 | 0 | 0 | A/A |
| control-1451 | 1 | 53 | 1 | 1 | 0 | G/A |
| control-1452 | 1 | 48 | 1 | 0 | 1 | G/A |
| control-1453 | 2 | 56 | 0 | 0 | 0 | G/A |
| control-1454 | 1 | 53 | 0 | 0 | 1 | A/A |
| control-1455 | 1 | 55 | 1 | 0 | 1 | A/A |
| control-1456 | 1 | 54 | 1 | 0 | 1 | A/A |
| control-1457 | 1 | 53 | 0 | 0 | 1 | G/A |
| control-1458 | 1 | 54 | 1 | 0 | 1 | G/G |
| control-1459 | 1 | 51 | 1 | 0 | 0 | A/A |
| control-1460 | 1 | 53 | 1 | 0 | 1 | G/A |
| control-1461 | 1 | 52 | 1 | 0 | 0 | A/A |
| control-1462 | 1 | 53 | 1 | 0 | 1 | A/A |
| control-1463 | 1 | 50 | 1 | 0 | 1 | G/A |
| control-1464 | 1 | 53 | 0 | 0 | 0 | A/A |
| control-1465 | 1 | 53 | 1 | 0 | 1 | A/A |
| control-1466 | 1 | 54 | 0 | 0 | 1 | A/A |
| control-1467 | 1 | 47 | 1 | 0 | 0 | A/A |
| control-1468 | 1 | 55 | 0 | 0 | 1 | A/A |
| control-1469 | 1 | 55 | 1 | 0 | 0 | A/A |
| control-1470 | 1 | 44 | 1 | 0 | 1 | A/A |
| control-1471 | 1 | 54 | 1 | 0 | 1 | G/A |
| control-1472 | 2 | 50 | 0 | 0 | 1 | A/A |
| control-1473 | 2 | 52 | 0 | 0 | 1 | G/A |
| control-1474 | 1 | 53 | 1 | 0 | 1 | A/A |
| control-1475 | 1 | 52 | 1 | 0 | 0 | A/A |
| control-1476 | 1 | 50 | 0 | 0 | 0 | A/A |

---
